# 1 SARS-CoV-2 infection results in lasting and systemic perturbations 2 post recovery

3  
4 Justin J. Frere<sup>1,2</sup>, Randal A. Serafini<sup>3</sup>, Kerri D. Pryce<sup>3</sup>, Marianna Zazhytska<sup>4</sup>, Kohei Oishi<sup>2</sup>, Ilona Golynger<sup>2</sup>, Maryline Panis<sup>2</sup>,  
5 Jeffrey Zimering<sup>3,5</sup>, Shu Horiuchi<sup>2</sup>, Daisy A. Hoagland<sup>1</sup>, Rasmus Møller<sup>2</sup>, Anne Ruiz<sup>3</sup>, Jonathan B. Overvest<sup>6</sup>, Albana Kodra<sup>4</sup>,  
6 Peter D. Canoll<sup>7</sup>, James E. Goldman<sup>7</sup>, , Alain C. Borczuk<sup>8</sup>, Vasuretha Chandar<sup>9</sup>, Yaron Bram<sup>9</sup>, Robert Schwartz<sup>9,10</sup>, Stavros  
7 Lomvardas<sup>4</sup>, Venetia Zachariou<sup>3</sup>, Benjamin R. tenOever<sup>1,2</sup>

8  
9 <sup>1</sup> Department of Microbiology, Icahn School of Medicine at Mount Sinai, New York, NY

10 <sup>2</sup> Department of Microbiology, New York University, Langone Health, New York, NY

11 <sup>3</sup> Department of Neuroscience, Icahn School of Medicine at Mount Sinai, New York, NY

12 <sup>4</sup> Mortimer B. Zuckerman Mind, Brain and Behavior Institute, Columbia University, New York, NY

13 <sup>5</sup> Department of Neurosurgery, Icahn School of Medicine at Mount Sinai, New York, NY

14  
15 <sup>6</sup> Department of Otolaryngology- Head and Neck Surgery, Columbia University Irving Medical Center, Vagelos College of  
16 Physicians and Surgeons, Columbia University, New York, NY

17  
18 <sup>7</sup> Department of Pathology and Cell Biology, Columbia University Irving Medical Center, Vagelos College of Physicians and  
19 Surgeons, Columbia University, New York, NY

20  
21 <sup>8</sup> Department of Pathology and Laboratory Medicine, Weill Cornell Medicine, New York, NY

22  
23 <sup>9</sup> Department of Physiology, Biophysics, and Systems Biology, Weill Cornell Medicine, New York, NY

24 <sup>10</sup> Division of Gastroenterology and Hepatology, Department of Medicine, Weill Cornell Medicine, New York, NY

25  
26 \*To whom correspondence should be addressed: [venetia.zachariou@mssm.edu](mailto:venetia.zachariou@mssm.edu), and [Benjamin.tenOever@nyulangone.org](mailto:Benjamin.tenOever@nyulangone.org)

## 27 28 29 SUMMARY

30 SARS-CoV-2 has been found capable of inducing prolonged pathologies collectively  
31 referred to as Long-COVID. To better understand this biology, we compared the  
32 short- and long-term systemic responses in the golden hamster following either  
33 SARS-CoV-2 or influenza A virus (IAV) infection. While SARS-CoV-2 exceeded IAV  
34 in its capacity to cause injury to the lung and kidney, the most significant changes  
35 were observed in the olfactory bulb (OB) and olfactory epithelium (OE) where  
36 inflammation was visible beyond one month post SARS-CoV-2 infection. Despite a  
37 lack of detectable virus, OB/OE demonstrated microglial and T cell activation,  
38 proinflammatory cytokine production, and interferon responses that correlated with  
39 behavioral changes. These findings could be corroborated through sequencing of  
40 individuals who recovered from COVID-19, as sustained inflammation in OB/OE  
41 tissue remained evident months beyond disease resolution. These data highlight a  
42 molecular mechanism for persistent COVID-19 symptomology and characterize a  
43 small animal model to develop future therapeutics.

44  
45  
46

## 47 INTRODUCTION

48 SARS-CoV-2 is a respiratory RNA virus that emerged in 2019 and is associated with  
49 a variety of clinical phenotypes ranging from asymptomatic to more severe disease  
50 generally referred to as coronavirus-induced disease (COVID-19)(Yuki et al., 2020).  
51 In most cases among young and healthy individuals, COVID-19 is characterized by a  
52 mild flu-like illness and includes limited respiratory tract congestion, fever, myalgia,  
53 headache, and anosmia (Hu et al., 2021; Wiersinga et al., 2020; Zhu et al., 2020).  
54 Amongst older populations, especially males and those with co-morbidities, COVID-  
55 19 can result in severe respiratory distress, multi-organ complications, and death  
56 (Bhopal and Bhopal, 2020; Yuki *et al.*, 2020).

57

58 Regardless of age or underlying health, virus infection is thought to impair host  
59 transcriptional and translational processes to enhance replication (Banerjee et al.,  
60 2020; Schubert et al., 2020; Thoms et al., 2020). As a result, infected cells are  
61 unable to elicit a Type I interferon (IFN-I) response, a central mediator for initiating  
62 the host's antiviral defenses through the upregulation of hundreds of antiviral  
63 interferon-stimulated genes (ISGs) (Blanco-Melo et al., 2020; Hadjadj et al., 2020).  
64 During a SARS-CoV-2 infection, induction of IFN-I largely derives from uninfected  
65 cells such as resident macrophages and other phagocytic cells (Grant et al., 2021).  
66 Interestingly, despite blocking many aspects of the host antiviral response, SARS-  
67 CoV-2 infection results in persistent signaling of the NF $\kappa$ B transcription factor family,  
68 culminating in high levels of proinflammatory cytokines (i.e. interleukin 6, IL6) and  
69 chemokines (i.e. CXCL10) (Blanco-Melo *et al.*, 2020; Lucas et al., 2020; Nilsson-  
70 Payant et al., 2021). As a result of these dynamics, high levels of neutrophils and  
71 monocytes amass in the respiratory tract as the virus propagates in an environment  
72 with minimal antiviral defense engagement - further exacerbating the inflammatory  
73 environment. Virus infection results in extensive damage to the bronchial epithelium  
74 and pulmonary edema due to the proinflammatory cytokine response and/or a loss of  
75 normal lung function (Hu *et al.*, 2021; Wiersinga *et al.*, 2020; Zhu *et al.*, 2020).

76

77 Characterization of SARS-CoV-2 biology has identified ACE2 and a small subset of  
78 proteases that enable viral entry (Cantuti-Castelvetri et al., 2020; Daly et al., 2020;  
79 Hoffmann et al., 2020). Despite the expression of these factors on multiple tissues,  
80 productive SARS-CoV-2 infection appears to be largely contained in the respiratory

81 tract (Hu *et al.*, 2021; Wiersinga *et al.*, 2020; Zhu *et al.*, 2020). Selective localization  
82 in the airways however is not a product of viral tropism or receptor expression but  
83 rather a result of the systemic IFN-I response which radiates from the site of  
84 infection. For example, human organoid models have demonstrated productive  
85 infection of diverse tissues *ex vivo* despite being rarely observed *in vivo* (Asano et  
86 al., 2021; Lamers et al., 2020; Yang et al., 2020). This phenomenon can also be  
87 modeled in the golden hamster, arguably the best small animal model for COVID-19,  
88 which demonstrates consistent infection of the respiratory tract and olfactory  
89 epithelium with only sporadic isolation of virus from other tissues unless IFN-I biology  
90 is disrupted (Boudewijns et al., 2020; Hoagland et al., 2021; Imai et al., 2020; Sia et  
91 al., 2020; Zazhytska et al., 2021). This same phenomenon can be observed when  
92 infected individuals are immunosuppressed (Asano *et al.*, 2021; Bastard et al., 2020;  
93 Puelles et al., 2020). While it remains unclear how common infection of distal tissues  
94 is during a SARS-CoV-2 infection, system-wide inflammation is consistent (Hu *et al.*,  
95 2021; Wiersinga *et al.*, 2020; Zhu *et al.*, 2020). Together these data suggest that the  
96 molecular underpinnings of acute COVID-19 are a by-product of the damage caused  
97 by the virus and the systemic response that ensues.

98

99 In most individuals, virus infection is successfully cleared with the appearance of  
100 neutralizing antibodies to the Spike (S) attachment protein. Generally, the  
101 appearance of the humoral response correlates to resolution of the symptoms  
102 associated with SARS-CoV-2 (Bartsch et al., 2021; Brouwer et al., 2020; Garcia-  
103 Beltran et al., 2021). However, a growing body of evidence suggests that in a subset  
104 of individuals, SARS-CoV-2 infection results in prolonged complications including  
105 shortness of breath, persistent fevers, fatigue, depression, anxiety, and a state of  
106 chronic impairment of memory and concentration known colloquially as “brain fog”.  
107 The direct cause of these impairments, known collectively as “long COVID” or post  
108 acute sequelae of COVID-19 (PASC), is currently unknown (Nalbandian et al., 2021;  
109 Sudre et al., 2021).

110

111 To better understand the prolonged effects caused by SARS-CoV-2 infection, we  
112 focused on the golden hamster as a model system. The hamster model has proven  
113 to largely phenocopy COVID-19 biology without any requirement for SARS-CoV-2  
114 adaptation and has demonstrated a propensity to display severe lung morphology

115 and a tropism that matches what is observed in human patients (de Melo *et al.*, 2021;  
116 Hoagland *et al.*, 2021; Imai *et al.*, 2020; Sia *et al.*, 2020). Here we show that while  
117 both IAV and SARS-CoV-2 induce a systemic antiviral response, only the latter  
118 infection results in sustained inflammatory pathology that extends well beyond  
119 clearance of the primary infection. As this sustained inflammation also correlates  
120 with behavioral abnormalities, we propose that this biology may underlie prolonged  
121 symptomatology that results from SARS-CoV-2 infection.

122

## 123 **RESULTS**

### 124 **SARS-CoV-2- and IAV-infected hamsters induce a host response that mirrors** 125 **human biology and resolves within two weeks post infection.**

126 To define the unique characteristics of SARS-CoV-2 infection that may contribute to  
127 persistent symptomatology, we performed a longitudinal study in hamsters infected  
128 with either SARS-CoV-2 or Influenza A virus (IAV). These data demonstrated that  
129 both respiratory RNA viruses could replicate in the lungs of the golden hamster,  
130 albeit with different rates of clearance, consistent with what has been reported  
131 elsewhere (Figure 1A-B, S1A-B) (Hoagland *et al.*, 2021). IAV challenge resulted in  
132 peak titers of  $10^7$  plaque forming units per gram of lung tissue (pfu/g) on day three  
133 followed by a sharp decline in infectious material – showing a complete loss of  
134 infectivity by day seven post-infection (Figure 1A). For SARS-CoV-2, we also  
135 observed peak viral titers on 3 days post-infection (dpi) ( $\sim 10^8$  pfu/g), however these  
136 levels persisted till day 5 before declining (Figure 1B). Despite the difference in  
137 controlling overall virus levels, in both model systems, no infectious virus could be  
138 isolated on day seven although trace levels of RNA remained detectable via  
139 quantitative reverse-transcription-based PCR (qRT-PCR) for the nucleoprotein of  
140 influenza (NP) as well as the sub-genomic mRNA of nucleocapsid (N) from SARS-  
141 CoV-2 (Figure 1A-B and S1A-B). Based on these data, we decided to focus on day  
142 three to compare the acute host response to these two respiratory infections.

143

144 To compare the pathology resulting from IAV vs. SARS-CoV-2, we examined cross  
145 sections of the hamster lung at 3dpi using various histological techniques that were  
146 evaluated by a board-certified pathologist (Figure 1C-F). Hematoxylin and Eosin  
147 (H&E) staining on the lungs of hamsters infected with either IAV or SARS-CoV-2  
148 revealed large areas of intense staining (Figure 1C, black stars) that, at higher

149 magnification, were shown to be comprised of nuclei suggesting hypercellularity and  
150 the infiltration of inflammatory cells into both alveolar compartments and bronchiolar  
151 airway spaces (white stars). To better characterize the cellular content of the  
152 pulmonary inflammatory infiltrate, immunohistochemical (IHC) staining was used to  
153 label macrophages (IBA1) (Figure 1D), neutrophils (MPO) (Figure 1E), and T cells  
154 (CD3) (Figure 1F) on these same cross-sections. These efforts demonstrated that  
155 intensely hematoxylin-stained regions of the lung sections with either virus showed  
156 high levels of positivity for all three cell types, with neutrophils and macrophages  
157 predominating (Figures 1C-F). One notable difference between these virus models  
158 was that SARS-CoV-2 induced pulmonary infiltration, centrally located around  
159 bronchioles and larger airway structures (Figure 1C, black star). In contrast to the  
160 lung, examination of distal tissues including kidney and heart showed moderate to no  
161 pathological features at 3dpi for either virus (Figure S1C-D). We observed no signs  
162 of cellular infiltration in the kidney at this time point, whereas in the heart, an organ  
163 often associated with COVID-19 complications (Satterfield et al., 2021), we noted  
164 some evidence for inflammation and leukocytic infiltrate in response to both viruses  
165 (Figure S1C-D, green stars). Together, these data suggest that the hamster  
166 phenocopies many of the histological characteristics seen in the human response to  
167 IAV or SARS-CoV-2 during acute infection.

168  
169 To characterize the molecular dynamics of these model systems, we next performed  
170 RNA-Seq on infected lung from 3dpi (Figures 1G and S1E-F). These data identified  
171 ~100 differentially expressed genes (DEGs) with a P-adjusted value of less than 0.1  
172 in both SARS-CoV-2- and IAV-infected lungs. Gene set enrichment analyses  
173 (GSEA) against hallmark gene ontology sets implicated activation of the IFN-I and  
174 IFN-II response as well as TNF $\alpha$  and IL2 signaling in response to either infection  
175 (Figure S1G). These data could be further corroborated by immunohistochemistry of  
176 fixed lung tissue probed for the ISG MX1 (Figure 1H). Together, these data suggest  
177 that the host response to IAV and SARS-CoV-2 in the lung, kidney, and heart is  
178 comparable with the only major difference being that titers of SARS-CoV-2 were  
179 maintained through 5dpi.

180  
181 We next examined the transcriptional response to SARS-CoV-2- and IAV-infected  
182 hamsters at 14dpi, ~one week post clearance (Figure 1A-B, G). In contrast to the

183 inflammation observed at 3dpi, sequencing SARS-CoV-2- or IAV-infected lung tissue  
184 at 14dpi showed minimal signs of an antiviral response (Figure 1G). Together, these  
185 data demonstrate that the golden hamster model shows a robust acute response in  
186 the respiratory tract that successfully resolves both IAV or SARS-CoV-2 infection.

187

### 188 **Transcriptional profiling of peripheral organs during active or resolved IAV vs.** 189 **SARS-CoV-2 infections**

190 To corroborate the clinical validity of the SARS-CoV-2 acute hamster data, we  
191 compared our RNA-seq analyses to published results from lungs of COVID-19  
192 deceased individuals that still had high viral loads at the time of death (Figure 2A-C)  
193 (Butler et al., 2021). In agreement with the published data, we find transcriptional  
194 signatures from both groups were dominated by a marked upregulation of the IFN-I  
195 response as well as TNF $\alpha$  signaling via NF $\kappa$ B (Blanco-Melo *et al.*, 2020; Hoagland *et*  
196 *al.*, 2021; Nilsson-Payant *et al.*, 2021).

197

198 As the host response to acute IAV vs. SARS-CoV-2 were comparable in the  
199 respiratory tract, we next sought to characterize distal tissues and expand our  
200 characterization to time points representing both active, as well as resolved  
201 infections. While COVID-19 symptoms usually resolve within four weeks post  
202 infection onset, symptoms can persist significantly longer in a subset of patients.  
203 Patients demonstrating symptoms lasting longer than four weeks following infection  
204 have now been clinically defined as having long COVID or PASC (Aiyegbusi et al.,  
205 2021). To this end, we conducted additional transcriptional profiling on the lung  
206 (blue), heart (red), and kidneys (green) from hamsters infected with SARS-CoV-2 or  
207 IAV at 3dpi and 31dpi – a timepoint where any symptom-generating pathology would  
208 be clinically defined as long COVID in a human patient (Figures 2A-B and S2A-C).  
209 Moreover, these data were cross-referenced to matching tissues derived from human  
210 COVID-19 cadavers actively infected at the time of death (Figure 2C). These  
211 comparisons encompassed more than 50 samples at both early and late time points  
212 which clustered based on tissues from which they derived (Figure S2D).

213

214 To first assess the acute response in a more systemic fashion, we utilized GSEA to  
215 characterize curated ontology gene sets from the aforementioned tissues. These  
216 efforts implicated a strong acute induction of the IFN-I response (FDR q-val < 0.0001)

217 in all three organs following either SARS-CoV-2 or IAV infection, that were also  
218 evident in corresponding human tissues (Figure 2A-C, S2E-G). Also of note, IFN-I  
219 signatures in the lung of hamsters and COVID-19 cadavers were also accompanied  
220 by upregulation of IFN-I-associated pathways including NF $\kappa$ B- and IL6-associated  
221 target genes (Figure S2H-J). Other enriched pathways induced when directly  
222 comparing SARS-CoV-2 to IAV infection included positive regulation of complement  
223 activation in the kidney and negative regulation of calcium channel formation in the  
224 heart, although these enrichments were relatively minor in comparison to the IFN-I  
225 signatures (Figure S2E-H). Together these data corroborate earlier studies and  
226 provide further support for the use of the golden hamster as a model for acute SARS-  
227 CoV-2 pathology (Hoagland *et al.*, 2021; Imai *et al.*, 2020).

228

229 Having established the hamster as a clinical proxy for systemic acute pathology in  
230 response to a respiratory infection, we next sought to extrapolate these findings to  
231 any possible long-term consequences. To this end we performed similar analysis on  
232 lung, heart, and kidney tissues from 31dpi, representing a time point greater than two  
233 weeks past disease resolution of the lungs (Figure 1A-B, 2D-F). In agreement with  
234 the clearance of virus, these analyses failed to show any significant enrichment of  
235 IFN-I-or chemokine related signatures in any of the tissues examined (Figure 2D-F).  
236 Instead, tissue-specific annotations identified various biologies involved in kidney  
237 resorption capacities and heart metabolism (Figure 2D-E). In the lung, GSEA at  
238 31dpi implicated general pathways of repair and regeneration (Figure 2F). Amongst  
239 these was the biogenesis of cilia and airway repair in the lung following infection  
240 which drives the upregulation of genes involved in axoneme assembly and filament  
241 sliding, which are also involved in pathways that identified sperm motility (Figure 2F).

242

243 To further visualize the development of the respiratory ontologies over time, we  
244 combined all of the sequencing performed on days 3, 14, and 31dpi and mapped  
245 their significance (Figure 2G-L). These data corroborated our earlier findings that  
246 SARS-CoV-2 and IAV infections were resolved by day 14 as the IFN-I response and  
247 neutrophil chemotaxis showed a lack of significant enrichment at both days 14 and  
248 31 post-infection despite their strong induction at 3dpi (Figure 2G-H). Next, we  
249 assessed microtubular motor activity and ciliary assembly ontologies over this  
250 longitudinal comparison to better understand the dynamics of bronchiolar repair given

251 this biology was enriched in both viral infection models at 31dpi (Figure 2F). While  
252 neither infection cohort showed an enrichment in ciliary-related ontologies at 3dpi,  
253 there appeared to be a disparity between the two groups at 14dpi (Figure 2I-J). At  
254 this time point, SARS-CoV-2-infected lungs uniquely displayed a significant negative  
255 enrichment of microtubular motor activity and a trending negative enrichment of  
256 axoneme assembly ontologies. As ciliary loss is part of the acute lung pathology  
257 following respiratory virus infection (Hoagland *et al.*, 2021), we found the decline of  
258 microtubules and axoneme assembly-related genes specifically in response to  
259 SARS-CoV-2 noteworthy. These findings suggest that SARS-CoV-2-induced  
260 transcriptional aberrations may still be prevalent past 14dpi, even in the absence of  
261 infectious virus or proinflammatory transcriptional profiles. These data suggest that  
262 SARS-CoV-2 induced damage may be more severe and/or persist for a longer  
263 duration in the respiratory tract as compared to IAV. However, by 31dpi, the  
264 significant increase in microtubular motor activity and axoneme assembly likely  
265 reflect active regeneration of the ciliary machinery. This biology also corresponds  
266 with the downregulation of genes associated with extracellular matrix assembly and  
267 collagen-trimer-related genes which are involved in tissue regeneration (Figure 2K-  
268 L)(Darby and Hewitson, 2007; Hogan *et al.*, 2014; Stone *et al.*, 2016). The shared  
269 trends observed for the GSEAs suggests a resolving repair response at 31dpi  
270 following either IAV or SARS-CoV-2 infection.

271

### 272 **Histological characterization of lung, heart, and kidney tissue in response to** 273 **SARS-CoV-2 or IAV 31dpi**

274 To assess long term organ damage independent of the transcriptional response, we  
275 profiled lung, heart, and kidney by histological analyses following IAV or SARS-CoV-  
276 2 infection at 31dpi (Figure 3 and S3). H&E staining revealed that both SARS-CoV-2-  
277 and IAV-infected lungs maintained their general structure but displayed numerous  
278 abnormalities. Most prominent amongst these pathologies was lambertosis (also  
279 known as peribronchiolar metaplasia) (black stars), a clinical finding in which alveolar  
280 epithelial cells undergo metaplastic transformation to become bronchiolar-epithelium-  
281 like in appearance (Figure 3A). This process generally occurs in response to severe  
282 respiratory trauma and can result in functional respiratory defects (Allen, 2010; Taylor  
283 *et al.*, 1992; Wright *et al.*, 2020). Notably, while lambertosis was generally localized  
284 to alveolar clusters immediately surrounding bronchioles, in the SARS-CoV-2-



285 infected lungs, peribronchiolar metaplasia could be seen expanding across large  
286 areas well beyond the general vicinity of the bronchiole, thus visible even at minimal  
287 magnification as a more intensely stained area (white star) (Figure 3A). Furthermore,  
288 lungs infected by both viruses showed signs of enlarged airway spaces and residual  
289 inflammation characterized by monocytes and neutrophils visible in the alveolar  
290 spaces (red stars) (Figure 3A). This residual inflammation is in agreement with our  
291 transcriptional profiling data which found *Cd177* and *Ly6d*, neutrophil- and monocyte-  
292 associated genes, respectively, were significantly upregulated in lungs infected by  
293 SARS-CoV-2 at 31dpi (Figure S2A). To confirm these findings, IHC staining was  
294 performed to label macrophage (IBA1), neutrophil (MPO), or T-cell (CD3) populations  
295 in histological sections of lungs of infected hamsters at 31dpi (Figure S3A-C). In  
296 contrast to lungs from mock-infected animals, lungs from IAV- and SARS-CoV-2-  
297 infected animals showed localized areas of hypercellularity that stained strongly  
298 positive for both neutrophil and macrophage populations (Figure S3A-C). Intriguingly,  
299 these hypercellular areas oftentimes appeared co-localized with areas of lambertosis,  
300 which could be distinguished via thickened alveolar walls compared to surrounding  
301 healthy and mock alveolar tissues. Additionally, in line with our sequencing, which  
302 identified a moderate and resolving repair response at 31dpi, Verhoeff Van Gieson  
303 staining, which labels collagen and elastin fibers, showed no obvious signs of fibrotic  
304 activity, collagen deposition, or elastin degradation in response to either infection  
305 (Figure S3D).

306

307 Given the persistent gene signatures on day 31 post-SARS-CoV-2 infection and the  
308 histological changes observed in the lung, we next assessed two distal organs via  
309 H&E staining: the kidneys and heart (Figure 3B and S3D). In the heart we observed  
310 complete resolution of leukocytic infiltration at 31dpi with no noteworthy histological  
311 signatures in response to infection (Figure S3E). In the kidney however, SARS-CoV-  
312 2-infected animals displayed areas of tubular atrophy characterized by thinning of  
313 tubular cells and widening of the tubular lumen (black stars) (Figure 3B). Closer  
314 examination also revealed the presence of proteinaceous fluid in the interstitial space  
315 surrounding these tissues (red stars). Examination of the kidneys at this time point  
316 from IAV-infected hamsters showed similar pathological findings (black stars);  
317 however, the affected areas appeared smaller and less numerous than in SARS-

318 CoV-2-infected hamsters consistent with the notion that IAV-induced damage is less  
319 severe than that of SARS-CoV-2 in this small animal model.

320

321 To better assess the extent of infection-induced scarring, we performed quantitative  
322 morphometric analyses on these histological images. Quantification of lambertosis  
323 and airway size showed that these pathologies were indeed significantly greater in  
324 the lungs of SARS-CoV-2-infected animals (Figure 3C and S3F). An identical trend  
325 was also clearly visible with respect to tubular atrophy and SARS-CoV-2 (Figure 3D).  
326 Together, these data demonstrate that both SARS-CoV-2 and IAV infections present  
327 similar histological signatures in the lungs and in other peripheral organs. However,  
328 despite comparable host responses, we do note a greater severity of scarring in  
329 SARS-CoV-2 infection, which, given its nature, may predispose infected individuals  
330 to greater functional defects in the affected organs.

331

### 332 **SARS-CoV-2 induces unique neural transcriptional profiles compared to IAV**

333 Given that long COVID may also involve neurological and neuropsychiatric  
334 symptomology (Sudre *et al.*, 2021), we next assessed the consequences of SARS-  
335 CoV-2 infection on the nervous system. For these studies, we transcriptionally  
336 profiled several areas of the nervous system from 3 and 31dpi cohorts. More  
337 specifically, the areas surveyed included the olfactory bulbs, medial prefrontal cortex  
338 (mPFC), striatum, thalamus, cerebellum, and trigeminal ganglion (tissues collected  
339 as depicted in Figure 4A). These areas were chosen either due to their previously  
340 documented positivity for SARS-CoV-2 transcripts in human patients (olfactory bulb,  
341 trigeminal ganglion) or due to their functional importance in sensory, motor, cognitive,  
342 and/or affective processes—all of which have been noted to be altered in subsets of  
343 long COVID patients (Carrera and Bogousslavsky, 2006; Cox and Witten, 2019;  
344 Euston *et al.*, 2012; Gheusi *et al.*, 2000; Thalakoti *et al.*, 2007). Matched tissues from  
345 hamsters infected with IAV were also collected for comparison. Following tissue  
346 processing, brain regions from 3dpi were surveyed for the presence of viral RNA. As  
347 expected, in hamsters infected with IAV, no viral RNA could be detected from the  
348 surveyed neural tissue that aligned to the IAV genome (Figure S4A). In contrast,  
349 within the SARS-CoV-2-infected hamster cohort, viral reads were readily detectable  
350 in the nervous system in a subset of animals, consistent with the findings of others  
351 (de Melo *et al.*, 2021). Of note, in one hamster, SARS-CoV-2 reads were detectable

352 in all surveyed regions of the nervous system (Figure 4B). Mapping of these reads to  
353 the SARS-CoV-2 genome revealed that most reads aligned to the nucleocapsid (N)  
354 transcript, potentially implicating the deposition of circulating subgenomic RNA from a  
355 peripheral infection which is dominated by N (Figure 4B)(Alexandersen et al., 2020).

356

357 To further characterize the appearance of SARS-CoV-2 genetic material in the brains  
358 of infected hamsters, a time course was conducted in which geographically distinct  
359 regions of the brain were sampled on days 1, 4, 7, and 14 post-infection in both  
360 SARS-CoV-2- and mock-infected hamsters. Olfactory bulb, striatum, and cerebellum  
361 were chosen for their respective positioning in the anterior, middle, and posterior  
362 sections of the cranial cavity. These regions were assessed for SARS-CoV-2 sgN  
363 transcripts via qPCR and compared to lung, the primary site of infection (Figure S4B-  
364 E). Mirroring previous data (Figure 1A-B, S1A-B), SARS-CoV-2 sgN detection in the  
365 lungs was highest on days 1 and 4. By 7dpi, sgN detection significantly diminished,  
366 with only negligible levels detectable at 14dpi (Figure S4B). In the olfactory bulb, a  
367 low level of sgN at 1dpi increased to a more prominent level at 4dpi in two of three  
368 hamsters before dissipating over the next seven days (Figure S4C). Interestingly,  
369 striatum and cerebellum demonstrated different patterns of sgN positivity compared  
370 to both lungs and olfactory bulbs. At 1dpi, SARS-CoV-2-infected hamsters  
371 demonstrated sgN positivity in one out of three tested striatum sections and in all of  
372 the cerebellum samples (Figure S4D-E). Beyond this early time point, however, no  
373 cerebellum or striatum sections demonstrated sgN signal that rose above  
374 background.

375

376 To assess whether sgN positivity was associated with triggering of an innate immune  
377 response, transcripts for *Isg15*, a canonical IFN-I stimulated gene, were assessed in  
378 sampled regions via qPCR (Figures S4F-I). In general, *Isg15* signal correlated with  
379 sgN positivity; in lungs, for instance, *Isg15* signal was elevated on days 1, 4, and 7  
380 post-infection, with its peak at 4dpi (Figure S4F). Striatum and cerebellum likewise  
381 show induction of *Isg15* signal at 1dpi in infected tissues, after which *Isg15*  
382 expression returns to levels similar to mock-infected tissues; this *Isg15* spike at 1dpi  
383 mirrors the positive sgN signal in these tissues (Figures S4D-E and S4G-H). The  
384 olfactory bulbs show similar *Isg15* levels following sgN signal on days 1, 4, and 7

385 post-infection; however, at 14dpi, the olfactory bulb intriguingly shows a newly  
386 elevated *Isg15* signal in the absence of any sgN positivity (Figures S4C and S4I).

387

388 To better understand the functional impacts that systemic SARS-CoV-2 and IAV  
389 challenge have on the nervous system, differential expression analyses of host  
390 transcripts were subsequently conducted across all sequenced neural areas from 3  
391 and 31dpi following challenge with either SARS-CoV-2 or IAV and were compared to  
392 mock infection (Figure 4C-H). Several brain areas showed significant region-specific  
393 transcriptional alterations induced by viral infection at 3dpi. Intriguingly, this was  
394 evident for both SARS-CoV-2 and IAV (Figure 4C-H). Direct comparison of SARS-  
395 CoV-2 and IAV by differential expression analyses revealed that most surveyed  
396 regions induced a very similar transcriptional profile between the two viruses at 3dpi  
397 (Figure S4J-K). These findings are most prominent in the striatum, where comparison  
398 of SARS-CoV-2 vs. mock conditions revealed more than 3500 DEGs in contrast to  
399 the comparison of SARS-CoV-2 vs. IAV, which demonstrate no significant  
400 transcriptional differences (Figure 4D and S4J). In contrast, these analyses also  
401 revealed significantly different transcriptional profiles in many of the surveyed regions  
402 in response to SARS-CoV-2 and IAV infection at 3dpi. These differential responses  
403 to the two viral challenges are most prominent in the thalamus, cerebellum, and  
404 trigeminal ganglion (Figure 4E-G and S4J-K).

405

406 Additionally, this differential expression analysis demonstrated that transcriptional  
407 programs induced in neuronal tissue during viral challenge persisted for at least one-  
408 month post-infection. Indeed, all surveyed regions showed DEGs in response to at  
409 least one of the viruses at 31dpi, albeit strikingly few changes observed in the  
410 trigeminal ganglion (Figure 4C-H). These transcriptional signatures were comparable  
411 between SARS-CoV-2 and IAV in the striatum, mPFC, and cerebellum (Figure S4J-  
412 K). However, similar to the acute response at 3dpi, we again observe specific  
413 neuronal regions in which a unique transcriptional signature persists in response to  
414 SARS-CoV-2. These virus-specific signatures can be found in the thalamus and  
415 olfactory bulb (Figure 4E, 4H, S4J-K).

416

417 To better understand the significance of the transcriptional changes taking place  
418 during infection, we again performed an unbiased GSEA (Figure 3I). While

419 enrichment of ontologies varied substantially between tissue, timepoint, and viral  
420 species, most notable enrichments related to four general categories: metabolism,  
421 synaptic signaling, neuronal plasticity, and immune response (Figure 4I). At 3dpi,  
422 widespread metabolic modulation was observed within the surveyed neural tissues in  
423 response to both SARS-CoV-2 and IAV (Figure 4I, top left quadrant). One example  
424 from data collected from the cerebellum and the trigeminal ganglion indicates strong  
425 negative enrichment of oxidative phosphorylation. Conversely, the striatum and the  
426 thalamus demonstrated inverse trends in response to both SARS-CoV-2 and IAV  
427 infections, showing an increase in oxidative phosphorylation amongst other metabolic  
428 ontologies. Interestingly, these trends are reversed at 31dpi with cerebellum and  
429 trigeminal ganglion showing an increase in oxidative phosphorylation in contrast to  
430 striatum and mPFC where these signatures become negatively enriched (Figure 4I).  
431 These data suggest a dynamic process of metabolic changes that occur throughout  
432 the central nervous system in response to viral challenge.

433

434 To better assess the functional impact of viral insult or associated metabolic  
435 modulation on neuronal tissue, ontologies relating to synaptic signaling and neural  
436 plasticity were further examined. Changes in synaptic signaling showed distinctive  
437 responses to SARS-CoV-2 in the thalamus and cerebellum at 3dpi but for all other  
438 regions, this response was either not significant or unique when comparing virus  
439 challenge models (Figure 4I). Similarly, when examining genes associated with  
440 synaptic plasticity, we observe down regulation of these processes predominantly in  
441 response to SARS-CoV-2 and primarily only during the acute phase of infection,  
442 although unique changes in response to IAV can also be visualized. Lastly, we  
443 examined gene ontologies encompassing aspects of the immune response following  
444 either SARS-COV-2 or IAV infection. Like the metabolic signatures, we observe  
445 similar responses between SARS-CoV-2 and IAV during acute infection. In line with  
446 earlier qPCR data from early infection time points (Figures S4F-I), the host response  
447 to SARS-CoV-2 or IAV infection results in IFN-I signatures across all neuronal  
448 tissues examined with the exception of thalamus (Figure 4I). Despite clearance of  
449 virus in both model systems and a broad resetting of neuronal and systemic  
450 inflammatory programs across surveyed tissues, we do observe persistent IFN-I and  
451 -II signatures selectively in the olfactory bulb following SARS-CoV-2 infection (Figure  
452 4I, bottom right quadrant).

453

454 **Characterization of a persistent immune response in the olfactory bulb and**  
455 **epithelium in response to SARS-CoV-2.**

456 Given the unique prolonged nature of the proinflammatory response in the olfactory  
457 bulb to SARS-CoV-2, we next examined specific genes driving this transcriptional  
458 program (Figure 5A-J). Comparing genes implicated in the IFN-I response induced  
459 by either IAV or SARS-CoV-2 at 3 and 31dpi highlighted the unique persistence of  
460 this transcriptional signature in response to SARS-CoV-2 (Figure 5A). These data  
461 demonstrated prolonged elevation of canonical ISGs such as *Isg15*, *Mx2*, and *Irf7*  
462 which could be independently corroborated by qRT-PCR (Figure 5B-D). To further  
463 confirm these findings, we performed immunostaining for MX1 on sections taken  
464 from the olfactory bulbs of hamsters either mock treated or infected with SARS-CoV-  
465 2 or IAV at 3 and 31dpi (Figure S5A). These data corroborated our transcriptome  
466 findings at the protein level and demonstrated elevated MX1 at both 3 and 31dpi in  
467 response to SARS-CoV-2, with immunolabeling remaining in the periphery of the  
468 olfactory bulbs (Figure S5A). In addition to ISGs, SARS-CoV-2 infection was also  
469 found to induce prolonged chemokine induction as denoted by *Cxcl10* and *Ccl5*  
470 amongst others (Figure 5E-F and S5B). Interestingly, the chemokine response  
471 observed appears more sustained—or even enhanced at 31dpi—compared to the  
472 IFN-I signature.

473

474 We next sought to determine the composition of immune cells participating in the  
475 prolonged inflammatory response. To this end, we analyzed transcriptomic data from  
476 olfactory bulbs at 31dpi to identify enriched gene sets that enable deconvolution to  
477 identify specific cell types present. These analyses showed profound enrichment for  
478 microglial and myeloid lineage gene sets, specifically in the SARS-CoV-2-infected  
479 hamsters at this time point (Figure 5H). This analysis was further supported by a  
480 directed GSEA which demonstrated a significant positive enrichment in markers for  
481 microglial activation (Figure S5C). To better assess how CNS-specific cell types were  
482 changing in response to SARS-CoV-2 infection at this time point, gene sets were  
483 created for neuronal and glial cell populations using known cell-type markers  
484 identified previously (Zhang et al., 2014). These efforts confirmed significant positive  
485 enrichment of microglial-specific transcriptomic signatures in olfactory bulbs from  
486 SARS-CoV-2-infected hamsters at 31dpi (Figure S5D). In contrast to immune cells,

487 gene sets identifying neuronal populations demonstrated significant negative  
488 enrichment at this same time point, indicating a potential loss of, or altered activity  
489 within, the neurons of SARS-CoV-2-infected hamsters as compared to mock-infected  
490 controls.

491

492 To further corroborate the transcriptional signatures of the olfactory bulbs in response  
493 to either SARS-CoV-2 or IAV, we performed independent qPCR validation and/or  
494 immunohistochemistry on genes for which commercial antibodies for the hamster  
495 were available. These efforts illustrated a significant recruitment of  
496 microglial/macrophage populations to the olfactory bulbs, as measured by *Aif-1*  
497 transcripts, uniquely in response to SARS-CoV-2 (Figure 5G). We next aimed to  
498 assess microglial activation at the histological level. Immunostaining for IBA-1, the  
499 protein encoded by *Aif-1*, demonstrated increased microglial positivity around the  
500 periphery of the olfactory bulb. This finding was most pronounced in olfactory bulbs  
501 from SARS-CoV-2-infected hamsters at 3dpi but could still be seen at 31dpi (Figure  
502 S5E-F). Microglia could be visualized clustering around the periphery of the olfactory  
503 bulbs in both SARS-CoV-2- and IAV-infected hamsters (Figure S5F-G). While the  
504 histological analyses revealed comparable IBA-1 staining between SARS-CoV-2 and  
505 IAV, it should be noted that microglial activation results in significant transcriptional  
506 changes following activation which were uniquely prominent in response to SARS-  
507 CoV-2 (He et al., 2021).

508

509 While GSEA data primarily implicated microglial and myeloid lineages in the inflammatory  
510 phenotype, a milder positive enrichment of T cell signatures was also noted. To assess the  
511 degree of T cell infiltration involved in the hamster response, olfactory bulbs from 31dpi  
512 were immunolabeled for CD3 (Figure S6A). Staining was noticeably sparse, with minimal  
513 numbers of cells (~20-50 cells/bulb) labeled positive in mock, IAV, and SARS-CoV-2  
514 olfactory bulb cross-sections.

515

516 To determine if sustained IFN-I or chemokine expression was the product of a  
517 chronic infection, we next performed qRT-PCR on the olfactory bulbs (Figure 5I).  
518 These data clearly demonstrate that at 31dpi, neither IAV nor SARS-CoV-2  
519 transcripts could be detected, although SARS-CoV-2 subgenomic Nucleocapsid (N)  
520 levels were evident at 3dpi. qRT-PCR data was further validated by RNA *in situ*

521 hybridization which confirmed that SARS-CoV-2 Spike (S) staining was only  
522 observed at 3dpi in the glomerular region and was undetectable at 31dpi (Figures 5I  
523 and S6B).

524

525 To further assess whether inflammation of the olfactory bulbs was associated with  
526 cellular apoptosis in this region, we performed a TUNEL stain on mock-, SARS-CoV-  
527 2-, or IAV-infected hamsters at these times. Quantification of the total number of  
528 TUNEL-positive nuclei in the olfactory bulbs revealed no significant differences  
529 between the infection groups at either time point, indicating that neither the acute  
530 infection, nor the uniquely prolonged inflammatory patterns in SARS-CoV-2 olfactory  
531 bulbs, were associated with local apoptosis (Figure S6C).

532

533 To explore whether this proinflammatory signal was present in additional anatomical  
534 regions linked to the olfactory bulb, olfactory epithelium was harvested from hamsters  
535 infected with SARS-CoV-2, IAV, or PBS (mock) at 30dpi as this tissue has been  
536 demonstrated to harbor infectious virus (Hoagland *et al.*, 2021; Horiuchi *et al.*, 2021).  
537 Ontological analyses of mRNA-Seq data demonstrated that, similar to the olfactory  
538 bulbs, the olfactory epithelium of SARS-CoV-2-infected hamsters uniquely showed  
539 upregulated signatures for IFN-I and IFN-II (Figure 5J and S6D). These signatures  
540 were driven by expression of canonical ISGs such as *Isg15*, *Mx1*, *Mx2*, *Ifit3*, *Irf7*,  
541 *Oas2* and *Bst2*. Intriguingly, however, ontological analysis also highlighted several  
542 transcriptomic signatures implicating T cell recruitment, activation, differentiation, and  
543 immune response in the olfactory epithelium. Chemotactic recruitment signatures  
544 were driven by increases in expression of genes such as *Ccl7*, *Cxcl10*, *Ccl5*, and  
545 *Ccl11* as well as other cellular migration factor genes, such as *Jaml* and *Rac2*  
546 (Figures 5J and S6D). T cell activation ontologies, on the other hand, were driven by  
547 upregulated expression of antigen presentation markers, such as *Hla-dra*, *Wdfy4*,  
548 and *B2m* concurrently with upregulation of T cell-associated genes such as *Jak3*,  
549 *Coro1A*, *Cd3e*, *Cd3g*, and *Cd3d* (Figures 5J and S6D). In addition to immune  
550 signatures, these analyses highlighted a negative enrichment for genes relating to  
551 sensory perception of smell and olfaction capabilities which were present for both  
552 SARS-CoV-2- and IAV-infected hamsters (Figure S6D).

553



554 To better understand the cellular make up of this immune response, cell type  
555 enrichment analyses were again conducted (Figure S6E). Enrichment analyses  
556 implicated the presence of unique neuroepithelium lymphocytes and macrophage  
557 populations in the olfactory epithelium following SARS-CoV-2 infection.

558

559 Importantly, as SARS-CoV-2 has demonstrated sex-dependent biases, we also  
560 assessed whether evidence for sustained perturbations in the olfactory bulbs and/or  
561 epithelium were present in female hamsters. To this end, a cohort of all female  
562 hamsters were infected with SARS-CoV-2 or IAV and analyzed at 24dpi (Figure S6F-  
563 G). Consistent with our earlier results performed in male hamsters, we find elevated  
564 Isg15 and Ccl5 levels in both tissues.

565

### 566 **Olfactory inflammation is associated with behavioral alteration**

567 Given prior findings that hamsters, similar to humans, can experience anosmia in  
568 response to SARS-CoV-2 infection (de Melo et al., 2021), and the fact that injury to  
569 the olfactory bulb has been linked to development of neurobehavioral disorders such  
570 as depression (Hasegawa-Ishii et al., 2019; Hellweg et al., 2007; Kelly et al., 1997;  
571 Kim et al., 2019; Song and Leonard, 2005), we next strove to assess the functional  
572 consequences of sustained neuronal perturbations, such as prolonged olfactory bulb  
573 and epithelium inflammation in SARS-CoV-2-infected hamsters beyond 4 weeks  
574 post-infection.

575

576 To this end, we first looked to elucidate how SARS-CoV-2 infection affected olfaction.  
577 Hamsters infected with IAV or SARS-CoV-2 were assessed for smell and compared  
578 to a cohort of mock-infected animals. Utilizing a food-finding test at 3dpi, 15dpi, and  
579 28dpi, we confirmed the results reported in de Melo et al., showing SARS-CoV-2-  
580 infected hamsters took longer to find buried food at 3dpi while showing no significant  
581 difference at 15 or 28dpi when compared to mock or IAV which were  
582 indistinguishable and were thus plotted together (de Melo *et al.*, 2021)(Figure 6A-F  
583 and S6H-J). In contrast, when this same experiment was performed with readily  
584 visible food, all cohorts, at all time points tested, displayed roughly equivalent times  
585 (Figure S6H-J). This result came despite prolonged inflammation in both olfactory  
586 bulb and epithelium and coincided with transcriptional signatures indicative of  
587 diminished sensory perception of smell for both IAV and SARS-CoV-2 (Figure S6D).

588

589 To determine whether prolonged olfactory bulb inflammation was correlated with  
590 altered metrics on assays that assess affective behaviors, mock-, IAV-, and SARS-  
591 CoV-2- treated hamsters were subjected to a marble burying assay (Figure 6G-I).  
592 When hamsters were subjected to the this assay, an established metric for assessing  
593 rodent repetitive and anxiety-like behaviors (Yanai and Endo, 2021), SARS-CoV-2-  
594 infected animals demonstrated a significant reduction in burying activity compared to  
595 both mock and IAV groups, which performed comparably and were thus grouped  
596 together (Figure 6G). While several studies consider increased burying as a sign of  
597 elevated compulsiveness or anxiety-like behaviors, other studies have found that  
598 anxiogenic or compulsive behavior-inducing pharmacological substances can  
599 actually cause decreases in marble burying behavior that are well-below baseline  
600 (Jimenez-Gomez et al., 2011). In light of bi-directionally affected marble burying  
601 behavior suggesting altered affective states, this data suggests that SARS-CoV-2  
602 may induce mild, yet significant behavioral changes, and result in a mild vulnerability  
603 to environmental stressors.

604

605 **SARS-CoV-2 infection is associated with sustained inflammatory**  
606 **transcriptional programs in human olfactory bulb and olfactory epithelium**

607 Finally, to ascertain whether our data could be extended to aspects of the human  
608 disease, we performed RNA sequencing on post-mortem olfactory bulb and olfactory  
609 epithelium tissue from human donors that had recovered from a medically  
610 documented history of COVID-19 infection that had occurred at least one month prior  
611 to death (Figure 7A-F). Donors were screened to include only those who had died of  
612 causes unrelated to COVID-19 disease. Tissues from healthy donors without history  
613 of COVID-19 infection were also collected as controls.

614

615 For olfactory bulb tissues, two COVID-19 recovered (long post-COVID) donors and  
616 one uninfected control donor were able to be sequenced. Differential expression and  
617 gene enrichment analyses revealed the presence of proinflammatory transcriptional  
618 programs in the olfactory bulbs of the recovered donors compared to control tissues  
619 (Figure 7A-B). In agreement with that observed in hamsters, gene sets for  
620 complement (Figure 7A) and interferon (Figure 7B) demonstrated significant  
621 enrichment. Complement gene set enrichment was driven by upregulation of direct

622 complement cascade genes such as *C3*, *F8*, and *C1QA* as well as complement  
623 regulatory proteins such as *S100A9*, *SERPINE1*, and *CLU* (Figure 7A). Interferon  
624 ontologies were driven by shared upregulation of ISGs such as *ISG15*, *OAS3*,  
625 *ISG20*, *CXCL10*, *MX1*, *IFIT3*, *IFIT1*, and *IRF2*, as well as other immune-related  
626 genes such as those involved in antigen presentation (*B2M*, *HLA-DQA1*, *CD74*) and  
627 cytokine signaling (*IL7*, *IL6*, *IL4R*) (Figure 7B). Of note, one long post-COVID donor  
628 (Long Post-COVID 1) showed a higher level of inflammatory gene expression than  
629 the other, possibly reflecting their medical history as this individual had COVID-19  
630 within four months of death as opposed to the companion sample (~six months).

631

632 For olfactory epithelium tissues, two long post-COVID donors and three uninfected  
633 control donors were able to be successfully sequenced. Differential expression and  
634 gene enrichment analyses showed that, similar to findings in olfactory bulb tissues,  
635 long post-COVID donor tissue displayed enriched proinflammatory transcriptional  
636 profiles (Figure 7C-D). However, while tissue from olfactory bulbs were dominated by  
637 interferon-mediated transcriptional programs, olfactory epithelium tissues displayed a  
638 higher enrichment for gene sets detailing chemotactic and T cell-specific activities.  
639 These programs were respectively driven by upregulation of a variety of chemotactic  
640 (i.e. *CCL5*, *CCL8*, *CCL19*, *CXCR3*) and T cell-associated genes (i.e. *CD3D*, *CD3G*,  
641 *CD3E*, *GATA3*, *CD4*, *LY9*) (Figure 7C-D). Once again, one long post-COVID donor  
642 (Long Post-COVID 1) appeared to have a higher level of chemotactic and T cell  
643 markers than the other long post-COVID sample; likely reflecting the time between  
644 COVID-19 and death.

645

646 Comparison of the olfactory bulbs and olfactory epithelium from 31dpi derived from  
647 SARS-CoV-2-infected hamsters and long post-COVID humans demonstrated a  
648 strong degree of concordance between the respective transcriptional programs. In  
649 the olfactory bulb, both hamster and human SARS-CoV-2-recovered tissues show  
650 enhanced induction of IFN-II, leukocyte chemotaxis, and immune response pathways  
651 (Figure 7E). The two organs further show coordinated metabolic programs, with both  
652 hamster and human post-SARS-CoV-2 infection tissues demonstrating upregulation  
653 of ribosomal production (Figure 7E). Moreover, in the olfactory epithelium, both  
654 human and hamster tissues demonstrate enrichment of chemotaxis and T cell  
655 functional pathways after SARS-CoV-2 clearance. The strong correlation generated

656 when comparing transcriptional responses between hamsters and humans that have  
657 recovered from SARS-CoV-2 would suggest that the host response results in  
658 prolonged olfactory inflammation in both infections.

659

## 660 **DISCUSSION**

661 Together, these data demonstrate that SARS-CoV-2 and IAV infections produce a  
662 wide range of longitudinal systemic impacts that include both shared and unique  
663 characteristics between the two viruses. In peripheral tissues, such as lung, heart,  
664 and kidney, SARS-CoV-2 and IAV seem to induce similar transcriptomic and  
665 histological changes both during active infection and following viral clearance.  
666 However, levels of scarring from infection were more severe following SARS-CoV-2  
667 which induced a higher degree of kidney tubular atrophy and lambertosis compared  
668 to IAV. These differences likely reflect the unique biologies of the viruses. SARS-  
669 CoV-2 generates significantly more double stranded RNA (dsRNA) during its life  
670 cycle as a result of sgRNA production (Nilsson-Payant *et al.*, 2021; Perlman *et al.*,  
671 1986). Given the immunogenicity and stability of dsRNA, it seems reasonable to  
672 postulate that comparable levels of replication would result in a more robust immune  
673 response to SARS-CoV-2 as compared to IAV. Perhaps it is the unique magnitude  
674 of the host response to SARS-CoV-2 that induces the observed pathological  
675 abnormalities which would result in reduction of functional capacity in affected  
676 regions, as supported by previously reported data (Allen, 2010; Eddy, 2005; Fukuoka  
677 *et al.*, 2005; Schelling, 2016; Wright *et al.*, 2020; Yamashita *et al.*, 2020). Similar to  
678 peripheral tissues, the nervous system showed a mix of shared and unique  
679 responses to SARS-CoV-2 and IAV infection. During acute infection, both viruses  
680 induced central nervous system (CNS)-wide IFN-I responses as well as region-  
681 specific transcriptional alterations that in some cases persisted beyond one month  
682 following infection. The most prominent of these alterations took place in the striatum,  
683 where *both* IAV and SARS-CoV-2 induced similar changes associated with metabolic  
684 and functional shifts. Pre-clinical and clinical literature have correlated this type of  
685 activity within striatal subregions with chronic or traumatic stress (Magalhaes *et al.*,  
686 2019; Rangaprakash *et al.*, 2017), affective disorders (Oathes *et al.*, 2015; Torres-  
687 Sanchez *et al.*, 2017), and chronic pain states (Serafini *et al.*, 2020). These changes  
688 could partially underlie the increased clinical risk of neurological and neuropsychiatric

689 disorder onset associated with both IAV (Bornand et al., 2016) and SARS-CoV-2  
690 (Huang et al., 2021; Taquet et al., 2021).

691 In contrast to the striatum, the thalamus displays a differentially regulated response  
692 to SARS-CoV-2 and IAV infection. At 3dpi, SARS-CoV-2 infection induces a  
693 hypoexcitable state in the thalamus, while IAV pushes the region towards  
694 hyperexcitability. Clinical literature has identified cognitive deficits (Hosp et al., 2021)  
695 associated with acute, severe COVID-19, including confusion and dysexecutive  
696 syndrome (Beaud et al., 2021). While these are generally attributed to abnormalities  
697 in the nuclei of the frontal lobe, we found little evidence of transcriptional  
698 dysregulation in the mPFC, a key executive region. Our sequencing and ontological  
699 analyses suggests instead that thalamic dysregulation may contribute to cognitive  
700 disruption, potentially in the form of altered intra-thalamic function or functional  
701 connectivity with key brain regions that drive emotion, motivation, cognition, sleep,  
702 pain, wakefulness, and motor activity. Altered thalamic function and structure has  
703 been previously associated with cognitive deficits in conditions such as multiple  
704 sclerosis (Schoonheim et al., 2015), traumatic brain injury (Grossman et al., 2012),  
705 and Alzheimer's disease (Wang et al., 2012). Thalamic dysfunction may also underlie  
706 neurological conditions that have been observed in long COVID patients including  
707 chronic pain, headache, myalgias, seizures, sleep, and affective disorders (Feng et  
708 al., 2017; Greicius et al., 2007; Gustin et al., 2014; Hodaie et al., 2002; Iadarola et  
709 al., 1995; Li et al., 2019; Nosedà et al., 2017). Furthermore, transcriptomic changes  
710 strongly associated with dendrite development were also seen in this region at both  
711 early and late time points after SARS-CoV-2-infection but not in response to IAV-  
712 infection. Intriguingly, dysregulation of the key genes driving this enrichment in the  
713 SARS-CoV-2 thalamus (*Nrp1*, *App*, *Crtc1*, *Ctnnd2*, *Camk2a*, *Kalrn*, *Bmp7*, *Ppp1r9b*,  
714 *Mecp2*, *Cux1*, *Dlg4*, *Apoe*, *Ephb2*, *Map2k7*, *Ephb1*) are associated with cognitive  
715 impairments and affective disorders such as major depressive disorder when  
716 analyzed together using Enrichr's DisGeNET function (Kuleshov et al., 2016). Thus,  
717 regional transcriptional changes in thalamic nuclei may facilitate the development of  
718 neuropsychiatric disorders in patients recovering from SARS-CoV-2 infection.

719

720 By far, the most unique response to SARS-CoV-2 took place in the olfactory bulb. At  
721 31dpi, the olfactory bulb of IAV-infected hamsters returned to a baseline

722 transcriptional state while the same region of SARS-CoV-2-infected hamsters  
723 appeared to be in the midst of an ongoing infection characterized by microglial  
724 activation and a robust IFN-I and chemokine response. This was especially  
725 surprising given that we were unable to detect presence of viral RNA in either the  
726 olfactory bulb or lungs at this time point and, demonstrated previously, we know that  
727 hamsters generate a strong anti-S antibody response as early as seven days post  
728 infection (Hoagland *et al.*, 2021; Horiuchi *et al.*, 2021). Immunohistochemistry of MX1  
729 corroborated our transcriptional findings and showed localization of this persistent  
730 IFN-I response to the glomerular regions of the olfactory bulbs. Given the olfactory  
731 bulbs were positive for SARS-CoV-2 early in infection, these data may suggest either  
732 an undetectable level of replication is persisting in an adjacent region or that left-over  
733 debris is responsible for the continued inflammatory profile. Our inability to isolate  
734 infectious virus from hamsters from any tissue after seven days post infection would  
735 provide support for the latter hypothesis, although others have reported the ability to  
736 detect replication-competent virus from comparable tissues (de Melo *et al.*, 2021;  
737 Hoagland *et al.*, 2021; Horiuchi *et al.*, 2021).

738

739 Whatever the cause, chronic inflammation within the olfactory bulbs could impact  
740 sensory, emotional, and cognitive processes. The olfactory bulbs are functionally  
741 connected to—and can thus influence activity of—the limbic system, which controls  
742 appetitive, sensory, emotional, and cognitive responses. Indeed, prior preclinical  
743 studies link olfactory bulb damage with depressive phenotypes that can be reversed  
744 with antidepressant treatment (Guarnieri *et al.*, 2020; Hellweg *et al.*, 2007; Kelly *et al.*,  
745 1997; Song and Leonard, 2005). These data suggest that chronic nasal and  
746 olfactory bulb inflammation may drive neurodegeneration and structural changes  
747 consistent with long COVID symptoms (Hasegawa-Ishii *et al.*, 2017; 2019). This is  
748 further supported by recently reported clinical evidence that shows that patients that  
749 have recovered from even mild COVID-19 demonstrate loss of grey matter in limbic  
750 cortical areas functionally linked to the olfactory system (Douaud *et al.*, 2021). Taken  
751 together, our peripheral organ and central nervous system findings identify  
752 transcriptional and histologic signatures caused by SARS-CoV-2 infection that may  
753 induce a variety of somatosensory, affective, and cognitive impairments that persist  
754 well past the time of original infection. Given the systemic scope of these findings, we

755 hypothesize that they elucidate a molecular basis of much of the heterogenous  
756 symptomology that makes up long COVID.

757

## 758 **ACKNOWLEDGEMENTS**

759 This work was funded by generous support from the Zegar Family Foundation to the  
760 B.T. and funding from NINDS (NS111251, NSO86444, NSO86444S1 to V.Z. and  
761 R.A.S. In addition to funding support, we are indebted to the patients, their families,  
762 and healthcare workers that have been fighting the COVID-19 pandemic. In addition,  
763 we would like to thank Steven Salvatore, MD, for sharing his clinical expertise and for  
764 his work reviewing our kidney histology. We would like to further thank Francis Avila,  
765 Virginia Gillespie, DVM, Ying Dai, and the rest of the staff at the Mount Sinai Center  
766 for Comparative Medicine and Surgery and the Mount Sinai Biorepository and  
767 Pathology Core for their technical assistance in tissue preparation for histology. We  
768 would finally like to thank Alfred D. Doyle, PhD, for his technical guidance.  
769 Sequencing of some samples were performed at the New York Genome Center  
770 (NYGC) as part of the COVID-19 Genomic Research Network (CGRN) with funds  
771 generously provided by NYGC donors.

772

## 773 **AUTHOR CONTRIBUTIONS**

774 Project was conceptualized by J.J.F., R.A.S., V.Z., and B.T. Data was curated by  
775 J.J.F., M.Z., S.L., and B.T. Investigation was conducted by J.J.F., R.A.S., K.D.P.,  
776 M.Z., K.O., M.P., I.G., J.Z., S.H., D.A.H., R.M., A.R., A.K., Human OE/OB tissue was  
777 obtained from J.B.O, P.D.C., and J.E.G. Formal analysis was conducted by J.J.F.  
778 and A.C.B. Project administration was overseen by J.J.F., R.A.S., R.S, V.Z., and B.T.  
779 Writing—original draft was done by J.J.F., R.A.S., and B.T. Additional Writing—  
780 review & editing was performed by V.Z. Funding acquisition was done by S.L., V.Z.  
781 and B.T.

782

## 783 **FIGURE LEGENDS**

784 **Figure 1 SARS-CoV-2 and IAV infections induce clinically representative lung**  
785 **pathology and are cleared by 14dpi in the hamster model of disease**

786

787 **(A-B)** Titer data computed as plaque forming units per gram (PFU/g) of lung from  
788 hamsters infected with IAV (A/California/02/2009) or SARS-CoV-2 (USA/WA1/2020)  
789 on days indicated.

790

791 **(C)** H&E staining of hamster lungs treated with PBS (Mock), IAV, or SARS-CoV-2 at  
792 3dpi. Histological analysis at various magnifications denoting infiltration (black star)  
793 or bronchiolar epithelial necrosis (white star).

794

795 **(D-F)** Immunohistochemical labeling for **(D)** IBA1, **(E)** MPO, and **(F)** CD3, were used  
796 to label macrophage, neutrophil, and T cell populations, respectively, in the lungs of  
797 mock-, IAV-, and SARS-CoV-2-infected hamsters at 3dpi. Size of inset scale bars  
798 matches length described in column headers.

799

800 **(G)** RNA-sequencing of lungs from SARS-CoV-2- and IAV-infected hamsters was  
801 evaluated at 3dpi and 14dpi. Heatmap depicting log<sub>2</sub> fold-change of IFN-I response  
802 genes (derived from HALLMARK\_INTERFERON\_ALPHA\_RESPONSE gene set)  
803 compared to mock-infected animals was generated for these groups.

804

805 **(H)** Immunohistochemical labeling for interferon stimulated gene MX1 was assessed  
806 in lungs of mock-infected, IAV-infected, or SARS-CoV-2-infected hamsters at 3dpi.

807

808 **Figure 2 Transcriptional profiling of peripheral organs during active or**  
809 **resolved IAV vs. SARS-CoV-2 infections**

810

811 **(A-C)** Lungs (blue), kidneys (green), and hearts (red) of SARS-CoV-2-, IAV-, and  
812 mock-treated hamsters were harvested at 3dpi and transcriptionally profiled via RNA-  
813 seq. Differential expression analysis was conducted between infected and mock-  
814 infected groups with DESeq2 and analyzed via Gene Set Enrichment Analysis  
815 (GSEA) for enrichment of indicated gene sets. Enrichment analysis results for all  
816 three tissue types are displayed in a GSEA enrichment plot for **(A)** IAV vs. Mock and  
817 **(B)** SARS-CoV-2 vs. Mock comparisons. **(C)** Similar transcriptomic analyses were  
818 conducted on RNA-seq data generated from human lung, heart, and kidney samples  
819 obtained from the post-mortem tissues of COVID-19-infected and control donors.  
820 Results from enrichment analyses are shown as a GSEA enrichment plot.



821

822 **(D-F)** Differential expression analysis of RNA-Seq data derived from **(D)** Lungs, **(E)**  
823 kidneys, and **(F)** hearts of SARS-CoV-2-, IAV-, and mock-infected hamsters at 31dpi.  
824 Differential expression results were assessed via GSEA to test for enrichment of  
825 gene sets present in the MSigDB C5 gene set collection, which contains curated  
826 gene sets derived from the Gene Ontology resource. Significant ontological  
827 enrichments for SARS-CoV-2 vs. Mock differential expression analysis were further  
828 processed via REVIGO to remove redundant enrichments. The highest ranked non-  
829 redundant positive and negative enrichments for each organ are plotted by their  
830 normalized enrichment score (NES) (line magnitude) and significance ( $-\log_{10}(\text{FDR } q\text{-value})$ ) (dot size). GSEA enrichment for these same gene sets in IAV vs. Mock  
831 differential expression data for the same tissue are plotted side-by-side for  
832 comparison.  
833

834

835 **(G-L)** GSEA analysis from lung sequencing data from IAV-, SARS-CoV-2, and mock-  
836 infected hamster lungs at 3, 14, and 31dpi using curated gene ontology and human  
837 phenotype ontology gene sets. Directional significance of enrichment was plotted  
838 over time for **(G)** IFN-I response (GOBP\_RESPONSE\_TO\_TYPE\_I\_INTERFERON)  
839 **(H)** neutrophil chemotaxis (GOBP\_NEUTROPHIL\_CHEMOTAXIS) **(I)** microtubular  
840 motor activity (GOMF\_ATP\_DEPENDENT\_MICROTUBULE\_MOTOR\_ACTIVITY) **(J)**  
841 axoneme assembly (GOBP\_AXONEME\_ASSEMBLY) **(K)** extracellular matrix (ECM)  
842 assembly (GOBP\_EXTRACELLULAR\_MATRIX\_ASSEMBLY) **(L)** and collagen  
843 trimer-associated genes (GOCC\_COLLAGEN\_TRIMER). Dotted lines show the  
844 calculated statistic for FDR  $q\text{-val} = 0.05$  for positive and negative enrichment; thus,  
845 any points falling outside the dotted lines have FDR  $q\text{-val}$  of  $< 0.05$ .

846

847 **Figure 3 Morphological characterization of lung, heart, and kidney in response**  
848 **to SARS-CoV-2 or IAV at 31dpi**

849

850 **(A)** H&E staining on lungs of SARS-CoV-2-, IAV-, and mock-infected hamsters at  
851 31dpi. Histological analysis of lungs highlighting lambertosis at both low  
852 magnification (white stars) and at higher magnification (black stars) as well as  
853 residual immune infiltration into lung parenchyma (red stars).

854

855 **(B)** H&E staining on kidneys collected from the same infection groups as (A). Black  
856 and red stars denote areas of tubular atrophy and sprteinaceous fluid buildup,  
857 respectively.

858

859 **(C-D) Quantification of lambertosis (C)** and average tubular epithelial size **(D)** were  
860 quantified via morphometric image analysis. Error bars display standard error mean,  
861 and significance was quantified via one-way ANOVA with Tukey's Multiple  
862 Comparison Test (\* $p < 0.05$ , \*\* $p < 0.01$ , \*\*\* $p < 0.001$ )

863

864 **Figure 4 SARS-CoV-2 induces a unique neural transcriptional profile compared**  
865 **to IAV**

866

867 (A) Schematic of brain regions characterized in response to infection. mPFC,  
868 striatum, thalamus, cerebellum, trigeminal ganglion, and olfactory bulb were  
869 bilaterally harvested for RNA-sequencing analysis.

870

871 **(B)** Alignment of RNA-Seq data to the SARS-CoV-2 genome. Coverage of raw reads  
872 over the length of the genome are displayed as a histogram from each brain region  
873 noted.

874

875 **(C-H)** Differential expression analysis was conducted for IAV- or SARS-CoV-2-  
876 infected hamsters compared to mock-infected hamsters at 3dpi and 31dpi via  
877 DESeq2; differentially expressed genes with a p-adjusted value of less than 0.1 are  
878 plotted (black:  $p\text{-adj} > 0.05$ ,  $\log_2$  fold-change  $< 2$ ; blue:  $p\text{-adj} < 0.05$ ,  $\log_2$  fold-change  
879  $< 2$ ; green:  $p\text{-adj} > 0.05$ ,  $\log_2$  fold-change  $> 2$ ; red:  $p\text{-adj} < 0.05$ ,  $\log_2$  fold-change  $>$   
880  $2$ ).

881

882 **(I)** Differential expression data analyzed via GSEA using curated gene ontology and  
883 human phenotype ontology gene sets; significant enrichments for metabolic-,  
884 synaptic signaling-, neural plasticity-, and immune-related ontologies were displayed  
885 on the dot plot. Coloration designates normalized enrichment score (NES), with  
886 positive enrichment scores colored red and negative enrichment scores colored blue.  
887 Dot size is scaled to  $-\log_{10}(\text{FDR } q\text{-val})$  of enrichment; only enrichments with an FDR  
888  $q\text{-val}$  of less than 0.05 were plotted.

889

890 **Figure 5 Characterization of persistent inflammation in the olfactory bulb and**  
891 **epithelium in response to SARS-CoV-2**

892

893 **(A)** Differential expression analysis was conducted on RNA-sequencing of olfactory  
894 bulbs of 3dpi and 31dpi IAV- and SARS-CoV-2-infected hamsters compared to mock-  
895 infected hamsters. Log<sub>2</sub> fold-change of IFN-I response genes are displayed in  
896 heatmap.

897

898 **(B-G)** Expression of key IFN-I response associated genes **(B)** ISG15, **(C)** MX2, and  
899 **(D)** IRF7; chemokines **(E)** CXCL10, and **(F)** CCL5; and **(G)** microglial marker AIF-1  
900 (also known as IBA1) were quantified by qRT-PCR. Error bars display standard  
901 deviation, and significance was determined by independent tests on samples from  
902 3dpi and 31dpi for each gene using one-way ANOVA with Tukey's multiple  
903 comparisons test (\*p<0.05, \*\*p<0.01, \*\*\*p<0.001, \*\*\*\*p<0.0001).

904

905 **(H)** Differential expression data from 31dpi olfactory bulb RNA-sequencing was  
906 analyzed by GSEA analysis using MSigDB C8 gene set collection, which contains  
907 gene sets derived from single cell RNA-sequencing datasets that define specific  
908 cellular identity signatures. Top positive enrichments are plotted by their normalized  
909 enrichment score (NES) (magnitude of line) and significance (-log<sub>10</sub>(FDR q-val)) (dot  
910 size).

911

912 **(I)** Levels of IAV or SARS-CoV-2 RNA in the olfactory bulbs as measured by RT-  
913 qPCR with primers for IAV nucleoprotein (IAV NP) or SARS-CoV-2 subgenomic  
914 nucleocapsid protein (SARS-CoV-2 sgN), respectively. Error bars display standard  
915 deviation.

916

917 **(J)** Olfactory epithelium from mock-, IAV-, or SARS-CoV-2-infected hamsters were  
918 harvested and transcriptionally profiled via RNA-sequencing. Differential expression  
919 analysis was conducted on infected groups compared to mock. Log<sub>2</sub> Fold Change  
920 for expression of individual genes relevant to ontologies concerning IFN-I,  
921 chemokine, and T cell activation are presented in the graph for both IAV and SARS-  
922 CoV-2 compared to mock; error bars denote standard error.

923

924 **Figure 6 Olfactory inflammation is associated with behavioral alteration**

925

926 **(A-F)** IAV-, SARS-CoV-2, and mock-infected hamsters were assessed for smell at  
927 **(A)** 3dpi, **(B)** 15dpi, and **(C)** 28dpi using a buried food finding test. Kaplan-Meier  
928 curves demonstrate time to discovery of food across all time points and infection  
929 groups. Throughout the analyses, IAV- and mock-infected hamsters displayed nearly  
930 identical phenotypes, so they were grouped together to better highlight changes in  
931 SARS-CoV-2 infection group performance at **(D)** 3dpi, **(E)** 15dpi, and **(F)** 28dpi as  
932 measured by the time it took hamsters to find the buried food.

933

934 **(G)** All infection groups were assessed for behavior at 26dpi using the marble burying  
935 assay, a test classically utilized to measure repetitive, obsessive-compulsive, and  
936 anxiety-like behavior in rodents. The number of marbles that were greater than 60%  
937 buried were counted and graphed for each hamster.

938

939 **Figure 7 SARS-CoV-2 infection is associated with sustained inflammatory**  
940 **transcriptional programs in human olfactory bulb and olfactory epithelium**

941

942 **(A-B)** Radar plots derived from olfactory bulb tissues collected at autopsy from  
943 healthy control donors (Control) as well as donors that had previously recovered from  
944 clinically documented COVID-19 (Long Post-COVID). Donors were screened to only  
945 include those where COVID-19 positivity was documented >1 month prior to autopsy.  
946 Tissues were RNA-sequenced, and Long Post-COVID tissues were compared to  
947 control tissues via differential expression analysis. GSEA using the Hallmark Gene  
948 sets was utilized to characterize transcriptomic programs. Transcripts per million  
949 reads (TPM) counts for individual genes making up these responses were plotted  
950 onto radar plots. Gene expression is normalized to the highest expressing sample for  
951 each individual gene, with expression levels shown as the percentage of TPM value  
952 of this sample (which is shown as 100% of its own value).

953

954 **(C-D)** Analyses as described in (A) were used to characterize the transcriptional  
955 response of olfactory epithelium tissues harvested from Long-Post COVID and  
956 control donors.

957

958 **(E-F)** GSEA enrichment analyses from **(E)** olfactory bulb and **(F)** olfactory epithelium  
959 human tissues were plotted by their normalized enrichment scores (NES) (magnitude  
960 of line) and significance ( $-\log_{10}(\text{FDR } q\text{-value})$ ) (size of dot). GSEA enrichments of  
961 these same gene sets from analogous tissue analysis in hamsters (SARS-CoV-2-  
962 infected vs mock-infected olfactory bulb and epithelium tissues at 31dpi) was plotted  
963 beside matching human enrichment data.

964

## 965 **SUPPLEMENTAL INFORMATION LEGENDS**

### 966 **Figure S1 SARS-CoV-2 and IAV infections in hamsters induce transcriptional** 967 **and histological changes that mirror human infection pathology**

968

969 **(A-B)** Lungs of an independent longitudinal cohort of hamsters infected with **(A)** IAV  
970 or **(B)** SARS-CoV-2 were measured for viral load via RT-qPCR with primers for IAV  
971 nucleoprotein (IAV NP) or SARS-CoV-2 subgenomic nucleocapsid protein (SARS-  
972 CoV-2 sgN), respectively.

973

974 **(C-D)** H&E staining was conducted on **(C)** kidneys and **(D)** hearts of SARS-CoV-2-,  
975 IAV-, and mock-infected hamsters at 3dpi. Histological analysis of hearts confirmed  
976 by board-certified pathologist revealed leukocytic infiltration (green stars).

977

978 **(E-F)** Volcano plots depicting differential expression analysis conducted on RNA-  
979 sequencing data derived from lungs of IAV- or SARS-CoV-2-infected hamsters  
980 compared to mock-infected hamsters at 3dpi via DESeq2; differentially expressed  
981 genes with a p-adjusted value of less than 0.1 are plotted (black:  $p\text{-adj} > 0.05$ ,  $\log_2$   
982 fold-change  $< 2$ ; blue:  $p\text{-adj} < 0.05$ ,  $\log_2$  fold-change  $< 2$ ; green:  $p\text{-adj} > 0.05$ ,  $\log_2$   
983 fold-change  $> 2$ ; red:  $p\text{-adj} < 0.05$ ,  $\log_2$  fold-change  $> 2$ ).

984

985 **(G)** Lollipop charts denoting differential expression data analyzed via GSEA using the  
986 Hallmark gene sets. Charts display normalized enrichment score (NES) and a dot  
987 size scaled relative to  $-\log_{10}(\text{FDR } q\text{-val})$  of the enrichment for top ten most positively  
988 enriched gene sets and top three most negatively enriched gene sets in this analysis.

989

990 **Figure S2 SARS-CoV-2 and IAV induce lasting transcriptional signatures in**  
991 **peripheral organs that are detectable at 31dpi**

992

993 **(A-C)** Volcano plot denoting RNA-sequencing data conducted on **(A)** lungs, **(B)**  
994 hearts, and **(C)** kidneys tissue of IAV-, SARS-CoV-2-, and mock-treated hamsters at  
995 31dpi. Differential expression analysis was computed using DESeq2; differentially  
996 expressed genes with a p-adjusted value of less than 0.1 are plotted (black: p-adj >  
997 0.05, log<sub>2</sub> fold-change < 2; blue: p-adj < 0.05, log<sub>2</sub> fold-change < 2; green: p-adj >  
998 0.05, log<sub>2</sub> fold-change > 2; red: p-adj < 0.05, log<sub>2</sub> fold-change > 2).

999

1000 **(D)** RNA-sequencing data for all heart, lung, and kidney samples were hierarchically  
1001 clustered by maximal distance between read data for each sample.

1002

1003 **(E-G)** GSEA analysis using the MSigDB C5 curated gene ontology set was  
1004 conducted on 3dpi IAV vs. Mock and 3dpi SARS-CoV-2 vs. Mock differential  
1005 expression data for **(E)** lungs, **(F)** heart, and **(G)** kidneys. Top significant ontological  
1006 enrichments in SARS-CoV-2-associated analyses are plotted by their normalized  
1007 enrichment score (NES) (line magnitude) and significance (-log<sub>10</sub>(FDR q-value)) (dot  
1008 size). GSEA enrichment for these same gene sets in IAV vs. Mock differential  
1009 expression data for the same tissue is plotted side-by-side for comparison.

1010

1011 **(H-J)** GSEA using the Hallmark gene sets was conducted on RNA-sequencing  
1012 differential expression data comparing human early-infection SARS-CoV-2 lung  
1013 tissue from post-mortem donors to control human tissues for enriched ontologies  
1014 listed. Heat maps show log<sub>2</sub> Fold Change of individual genes comprising the  
1015 respective gene sets for both hamster and human infection groups compared to  
1016 control tissues.

1017

1018 **Figure S3 Histological analyses of SARS-CoV-2 and IAV-infected hamsters at**  
1019 **31dpi**

1020

1021 **(A-C)** Immunohistochemical labeling for **(A)** IBA1, **(B)** MPO, and **(C)** CD3, were used  
1022 to label macrophage, neutrophil, and T cell populations, respectively, in the lungs of

1023 mock-, IAV-, and SARS-CoV-2-infected hamsters at 31dpi. Size of inset scale bars  
1024 matches length described in column headers.

1025

1026 **(D)** Verhoeff Van Gieson staining was performed on sections derived from the lungs  
1027 of 31dpi SARS-CoV-2-, IAV-, and mock-infected hamsters.

1028

1029 **(E)** H&E staining was conducted on hearts of SARS-CoV-2-, IAV-, and mock-infected  
1030 hamsters at 31dpi.

1031

1032 **(F)** Airway sizes in cross-sections of lungs from 31dpi SARS-CoV-2-, IAV-, and  
1033 mock-infected hamsters were quantified via morphometric image analysis. Error bars  
1034 display standard error mean, and significance was quantified via one-way ANOVA  
1035 with Dunn's Multiple Comparison Test (\* $p < 0.05$ , \*\* $p < 0.01$ , \*\*\* $p < 0.001$ )

1036

1037 **Figure S4 SARS-CoV-2 and IAV induce both unique and shared transcriptional**  
1038 **responses in the nervous system**

1039

1040 **(A)** Olfactory bulbs, mPFC, striatum, thalamus, cerebellum, and trigeminal ganglion  
1041 were bilaterally sampled for RNA-sequencing analysis from 3dpi IAV-infected  
1042 hamsters. Sequencing reads were aligned to the IAV A/California/04/2009 genome,  
1043 and coverage of raw reads over the length of the genome were displayed as a  
1044 histogram for each brain region from the hamster with the highest number of reads.

1045

1046 **(B-E)** Lung, olfactory bulbs, striatum, and cerebellum were sampled from a  
1047 longitudinal SARS-CoV-2- or mock-infected hamster cohort at 1, 4, 7, and 14dpi and  
1048 assessed for SARS-CoV-2 subgenomic nucleocapsid (sgN) protein transcripts via  
1049 qRT-PCR. Values shown have Ct values for actin (*Actb*), a housekeeping control  
1050 gene, subtracted from Ct values for sgN for normalization.

1051

1052 **(F-I)** These longitudinal tissues were also assessed for expression of canonical IFN- $\lambda$   
1053 gene *Isg15* via qRT-PCR. Values shown display fold change normalized to mock  
1054 controls.

1055

1056 **(J)** Differential expression analysis was conducted for SARS-CoV-2-infected  
1057 hamsters compared directly to IAV-infected hamsters at 3dpi and 31dpi via DESeq2  
1058 across the sampled brain regions; differentially expressed genes with a p adjusted  
1059 value of less than 0.1 are plotted (black: p-adj > 0.05, log2 fold-change < 2; blue: p-  
1060 adj < 0.05, log2 fold-change < 2; green: p-adj > 0.05, log2 fold-change > 2; red: p-adj  
1061 < 0.05, log2 fold-change > 2).

1062

1063 **(K)** Rank-rank scatter plots were generated for each brain region at 3dpi and 31dpi to  
1064 compare coordination of gene expression from SARS-CoV-2- and IAV-infected  
1065 hamsters when compared to mock-infected hamsters.

1066

1067 **Figure S5 SARS-CoV-2 induces a uniquely prolonged chemokine signature**  
1068 **detectable at 31dpi in the olfactory bulb**

1069

1070 **(A)** Formalin-fixed paraffin-embedded (FFPE) olfactory bulbs from mock-, IAV-, or  
1071 SARS-CoV-2-infected hamsters at 3dpi and 31dpi were immuno-labeled for MX1  
1072 protein. Zoomed inset displays glomerular area of maximum positivity within each  
1073 sample.

1074

1075 **(B)** Differential expression analysis was conducted on RNA-sequencing of olfactory  
1076 bulbs of 3dpi and 31dpi IAV- and SARS-CoV-2-infected hamsters compared to mock-  
1077 infected hamsters. Log2 fold-change of curated chemokine genes from this analysis  
1078 are displayed in heatmap.

1079

1080 **(C)** GSEA of the GOBP\_MICROGLIAL\_CELL\_ACTIVATION ontology was conducted  
1081 on RNA-sequencing differential expression data from olfactory bulbs of 3dpi and  
1082 31dpi IAV- and SARS-CoV-2-infected hamsters and displayed as a GSEA  
1083 enrichment plot.

1084

1085 **(D)** Differential expression data comparing olfactory bulbs of 3 and 31dpi infected  
1086 hamster cohorts to mock-infected was analyzed for enrichment of cell types via  
1087 GSEA. Gene sets surveyed in this analysis were created using characterized cell  
1088 type-specific markers characterized in Zhang et al. (2014). Normalized enrichment



1089 score (NES) is plotted. Enrichments achieving significance (FDR q-value < 0.05) are  
1090 outlined in black.

1091

1092 **(E-F)** Formalin-fixed paraffin-embedded (FFPE) olfactory bulbs from mock-, IAV-, or  
1093 SARS-CoV-2-infected hamsters at **(E)** 3dpi and **(F)** 31dpi were immuno-labeled for  
1094 IBA-1 protein. Inset scale bar is representative of the length displayed at the bottom  
1095 of the given column.

1096

1097 **Figure S6 SARS-CoV-2-infection is associated with olfactory epithelium**  
1098 **inflammation and anosmia that resolves over time**

1099

1100 **(A)** Formalin-fixed paraffin-embedded (FFPE) olfactory bulbs from mock-, IAV-, or  
1101 SARS-CoV-2-infected hamsters at 31dpi were immuno-labeled for CD3 protein. Inset  
1102 scale bar is representative of the length displayed at the bottom of the given column.

1103

1104 **(B)** In-situ hybridization for SARS-CoV-2 S protein was conducted on FFPE olfactory  
1105 bulbs from SARS-CoV-2-infected hamsters at 3dpi and 31dpi. S protein transcripts  
1106 are visible as yellow puncta and DAPI nuclear staining is visible in blue. Zoomed  
1107 inset displays representative glomerular area of high positivity within each sample.

1108

1109 **(C)** Formalin-fixed paraffin-embedded (FFPE) olfactory bulbs from mock-, IAV-, or  
1110 SARS-CoV-2-infected hamsters at 31dpi were processed via TUNEL staining to  
1111 assess for apoptotic cells. The number of positive cells manually quantified in each  
1112 olfactory bulb section is reported here.

1113

1114 **(D)** Olfactory epithelium from SARS-CoV-2-, IAV-, and mock-infected hamsters was  
1115 harvested at 31dpi and assessed via RNA-seq. Differential expression analysis was  
1116 conducted with DESeq2 and analyzed via Gene Set Enrichment Analysis (GSEA)  
1117 using curated gene ontology sets. Lollipop charts show significance of enrichment (-  
1118  $\log_{10}$ [FDR q-val]) (dot size) and normalized enrichment score (NES) for SARS-CoV-  
1119 2 and IAV vs. mock.

1120

1121 **(E)** GSEA was also performed on 31dpi olfactory epithelium differential expression  
1122 data to assess for enrichment of cell-specific transcriptional signatures in SARS-CoV-  
1123 2- and IAV-infected hamsters compared to mock.

1124

1125 **(F-G)** Olfactory bulbs and epithelium were harvested from an independent cohort of  
1126 female hamsters at 24 dpi and assessed for the presence of **(F)** *Isg15* and **(G)** *Ccl5*  
1127 transcripts via qRT-PCR.

1128

1129 **(H-J)** The buried food-finding test was performed on hamsters at **(H)** 3, **(I)** 15, and **(J)**  
1130 28dpi. Following testing with time measured to discovery of buried food, the test was  
1131 also repeated with food that was visible rather than buried.

1132

## 1133 **METHODS**

### 1134 **Data visualization.**

1135 All non-RNA-Seq statistical analyses, box and bar graphs, and Kaplan-Meyer plots  
1136 were prepared using prism 9 as described in figure legends (GraphPad Software,  
1137 San Diego, California USA; <https://www.graphpad.com/>).

1138

### 1139 **Virus and cells**

1140 SARS-CoV-2 isolate USA-WA1/2020 was propagated in Vero-E6 cells in DMEM  
1141 supplemented with 2% FBS, 1mM HEPES and 1% penicillin/streptomycin. Virus  
1142 stocks were filtered via centrifugation with Amicon Ultra-15 Centrifugal filter unit  
1143 (Sigma). Infectious viral titers were quantified by plaque assay in Vero-E6 cells in  
1144 MEM supplemented with 2% FBS, 1mM HEPES and 0.7% OXOID agar (Thermo  
1145 Fisher). Assays were fixed in 5% paraformaldehyde and stained with crystal violet.  
1146 All infections were performed with either passage 3 or 4 SARS-CoV-2. Influenza A  
1147 virus H1N1 isolate A/California/04/2009 was propagated in MDCK cells in DMEM  
1148 supplemented with 0.35% BSA. All cells were tested for the presence of mycoplasma  
1149 using MycoAlert Mycoplasma Detection Kit (Lonza).

1150

### 1151 **Hamster experiments**

1152 6–7 week-old male Golden Syrian hamsters (*Mesocricetus auratus*) were obtained  
1153 from Charles River Laboratories. Hamsters were acclimated to the CDC/USDA-  
1154 approved BSL-3 facility at the Icahn School of Medicine at Mount Sinai or NYUL for  
1155 at least seven days. Hamsters were intranasally infected with PBS, 1000 PFU  
1156 (100uL) of SARS-CoV-2, or 100,000 PFU (100 uL) of H1N1 influenza A virus under  
1157 ketamine/xylazine anesthesia. Hamsters were euthanized via intraperitoneal injection

1158 of pentobarbital and cardiac perfusion with 60 mL PBS. Each tissue was harvested at  
1159 day 1-, 3-, 4-, 7-, 14-, or 31-days post-infection. Collected tissues were homogenized  
1160 with PBS or Trizol (Thermo Fisher) in Lysing Matrix A homogenization tubes (MP  
1161 Biomedicals) for 40 seconds at 6 m/s for 2 cycles in a FastPrep 24 5G bead grinder  
1162 and lysis system (MP Biomedicals) for plaque assay or RNA isolation, respectively.  
1163 Additional tissues were fixed in 4% paraformaldehyde for >72 hours prior to  
1164 embedding in paraffin wax blocks for histology. Prior to fixation, lungs were inflated  
1165 using 1.5 mL of 4% PFA administered via intratracheal catheter. An independent  
1166 female cohort of 6-7 week-old female Golden Syrian hamsters was also obtained  
1167 from Charles River Laboratories and treated in an analogous manner. These  
1168 hamsters were sacrificed at 24-days-post-infection, and collected tissues were  
1169 processed in an identical manner. All animal experiments were performed according  
1170 to protocols approved by the Institutional Animal Care and Use Committee (IACUC)  
1171 and Institutional Biosafety Committee at ISMMS and NYUL. Hamsters were randomly  
1172 assigned to the different treatment groups and all IAV and SARS-CoV-2 infections  
1173 were performed in the BSL-3 facility.

1174

#### 1175 **qRT-PCR**

1176 RNA was isolated from homogenized samples by TRIzol/phenol-chloroform  
1177 extraction. 1ug of total RNA from each tissue was reverse-transcribed into cDNA with  
1178 oligo dT primers using SuperScript II Reverse transcriptase (Thermo Fisher).  
1179 Quantitative RT-PCR was performed using primers described in table S2 and KAPA  
1180 SYBR Fast qPCR Master Mix (KAPA Biosystems) on a LightCycler 480 Instrument II  
1181 (Roche). Delta-delta-cycle threshold (DDCt) was determined relative to mock-  
1182 infected control unless otherwise stated (Hoagland et al., 2021).

1183

#### 1184 **Hamster RNA sequencing**

1185 RNA was isolated from homogenized samples by TRIzol/phenol-chloroform  
1186 extraction. 1 ug of total RNA from each tissue was enriched for polyadenylated RNA  
1187 and prepared for next-generation sequencing using the TruSeq Stranded mRNA  
1188 Library Prep Kit (Illumina) according to manufacturer's instructions. Prepared libraries  
1189 were sequenced on an Illumina NextSeq 500 platform. Fastq files were generated  
1190 with bcl2fastq (Illumina) and aligned to the Syrian golden hamster genome (MesAur  
1191 1.0, ensembl) using the RNA-Seq Alignment application (Basespace, Illumina).

1192 Salmon files were analyzed using the DESeq2 analysis pipeline (Love et al., 2014).  
1193 All genes with an adjusted p value (p-adj) of <0.1 were considered Differentially  
1194 Expressed Genes (DEGs). Gene Set Enrichment Analysis (GSEA) studies were  
1195 performed using the GSEA\_4.1.0 Mac App as made available by the Broad Institute  
1196 and UC San Diego (Mootha et al., 2003; Subramanian et al., 2005). Analyses were  
1197 conducted on a pre-ranked gene list with ranking statistic calculated from DESeq2  
1198 results output as follows:  $-\log_{10}(\text{p-value}) * \text{sign}(\log_2\text{FoldChange})$  (Reimand et al.,  
1199 2019). Unbiased GSEA analyses were conducted against the Hallmark Gene Sets  
1200 (v7.4), the curated C5 gene ontology and human phenotype ontology gene set (v7.4),  
1201 and the curated C8 cell type signature gene sets (v7.4) made available by the  
1202 Molecular Signatures Database (MSigDB). Additional GSEA analyses were  
1203 conducted on gene sets manually curated from prior publications as described in  
1204 text. All visualizations of RNA-sequencing differential expression data were created  
1205 in R using ggplot2, pheatmap, ComplexHeatmap, and gplots packages. Gene set  
1206 enrichment plots were adapted from VisualizeRNAseq  
1207 (<https://github.com/GryderArt/VisualizeRNAseq>). Radar plots were created using the  
1208 ggradar2 package (<https://github.com/xl0418/ggradar2>). Assessment of read  
1209 coverage of viral genome was conducted using Bowtie2 and IGV\_2.8.13 and  
1210 visualized using ggplot2. Rank-rank scatter plots were created using the RRHO  
1211 package using the same ranking statistic as was used in GSEA analyses (Plaisier et  
1212 al., 2010).

1213

#### 1214 **H&E, Verhoeff Van Gieson, TUNEL Staining and Quantification**

1215 Paraffin-embedded tissue blocks were cut into 5-micron sections and mounted on  
1216 charged glass slides. Sections were deparaffinized by immersion in xylene and  
1217 rehydrated in decreasing ethanol dilutions. Slides were then stained with hematoxylin  
1218 (Gill's formula, Vector Laboratories, Cat #H3401) and eosin Y (Sigma Aldrich, Cat  
1219 #E4009) according to manufacturer's instructions. Slides were dehydrated via  
1220 immersion in increasing concentrations of ethanol, cleared with xylene, and  
1221 coverslipped (Hoagland et al., 2021). Sections were assessed for clinical features by  
1222 a board-certified pathologist. Images were morphometrically analyzed using QuPath  
1223 (Bankhead et al., 2017) and ImageJ (Schneider et al., 2012). Randomly sampled  
1224 tissue regions were generated from digitized lung and kidney histological images. In  
1225 kidneys, these regions were assessed for average cellular size across each area. In

1226 lung sampled areas, lambertosis coverage and airway sizes were manually  
1227 quantified by treatment-blinded team members. Verhoeff Van Gieson staining was  
1228 performed on 5-micron sections that were cut from paraffin-embedded tissue blocks  
1229 and embedded on charged glass slides. Slides were stained using 'Elastic Stain Kit  
1230 (Verhoeff Van Gieson/EVG Stain)' kit (Abcam, ab150667) according to manufacturer  
1231 instructions. Slides were dehydrated via immersion in increasing concentrations of  
1232 ethanol, cleared with xylene, and coverslipped (Hoagland et al., 2021). Slides were  
1233 digitized using Hamamatsu S210 digital slide scanner. All images of slides were  
1234 captured using NDP.view.2 software (Hamamatsu).

1235

1236 TUNEL staining was performed on 5-micron sections that were cut from paraffin-  
1237 embedded tissue blocks and embedded on charged glass slides. Slides were  
1238 deparaffinized and processed using the 'TUNEL Assay Kit –BrdU-Red' kit (Abcam,  
1239 ab666110) according to manufacturer instructions. Nuclei were additionally stained  
1240 with DAPI. Slides were coverslipped and assessed via confocal microscopy. Total  
1241 number of TUNEL positive nuclei per cross-section of tissue were manually  
1242 tabulated.

1243

1244

#### 1245 **Immunohistochemistry**

1246 Paraffin-embedded tissue blocks were cut into 5-micron sections and mounted on  
1247 charged glass slides. Sections were deparaffinized by immersion in xylene and  
1248 rehydrated in decreasing ethanol dilutions. Antigen retrieval was performed for 45  
1249 minutes in IHC-Tek Epitope Retrieval Steamer (Cat #IW-1102) with slides immersed  
1250 in IHC-Tek Epitope Retrieval Solution (Cat #IW-1100). Tissue was blocked in TBS  
1251 with 10% goat serum and 1% bovine serum albumin. Primary antibody (MX-A:  
1252 Millipore Sigma, MABF938; IBA-1: Wako, 019-19741; CD3: Dako, A0452; MPO:  
1253 Dako, A0398) was added to slides at a dilution (MX-A, 1:100; IBA-1, 1:1000; CD3,  
1254 1:1000; MPO: 1:5000), and sections were incubated overnight at 4 degrees Celsius.  
1255 Slides were washed in TBS with 0.025% Triton X-100 prior to immersion in 0.3%  
1256 hydrogen peroxide in TBS for 15 minutes. Slides were washed once again and HRP-  
1257 conjugated secondary antibody was added at a 1:5000 concentration (Goat anti-  
1258 mouse: ThermoFisher, Cat #A21426; Goat anti-rabbit: Abcam, Ab6721). Slides were  
1259 washed twice prior to application of DAB developing reagent (Vector Laboratories,

1260 Cat #SK-4105). Slides were dehydrated via immersion in increasing concentrations  
1261 of ethanol, cleared with xylene, and coverslipped. Slides were digitized using  
1262 Hamamatsu S210 digital slide scanner. All images of slides were captured using  
1263 NDP.view.2 software (Hamamatsu).

1264

### 1265 **Olfaction Assessment**

1266 Olfaction was assessed via the buried food finding test as previously described (de  
1267 Melo *et al.*, 2021; Lazarini *et al.*, 2018). Hamsters were presented with cereal (Coco  
1268 Krispies, Kellogs) five days prior to test; all were consumed within 1 hour. 20 hours  
1269 prior to testing, hamsters were food restricted. On the day of testing, hamsters were  
1270 placed into clean cages with standard bedding and allowed to acclimate for 20  
1271 minutes. After 20 minutes, hamsters were moved to a holding cage for two minutes  
1272 while chocolate cereal was buried underneath the bedding in a corner of the testing  
1273 cage. Hamsters were then moved back to the cage with cereal in it and placed in the  
1274 opposite corner of the cage as the buried cereal. Hamsters were timed from  
1275 placement in cage to the time of detection of food (digging in the area of the buried  
1276 cereal). Hamsters were limited to a 15-minute maximum period to find cereal. Once  
1277 food was found, hamsters were moved back to holding cage for one minute, and food  
1278 was placed on top of bedding (visible) in a corner of the test cage during this time.  
1279 The hamster was then once again placed in the opposite corner of the test cage from  
1280 the cereal, and time was recorded from placement of hamster in cage to detection of  
1281 food. All behavioral studies were in compliance with institutional IACUC protocols  
1282 and took place inside of a biosafety cabinet according to BSL-3 protocols.

1283

### 1284 **Marble Burying Assay**

1285 The marble burying assay was adapted from previously described protocols (Yanai  
1286 and Endo, 2021). Hamsters were placed into a corner of a cage with clean bedding  
1287 that had 20 equally-spaced glass marbles placed inside of it. Hamsters were allowed  
1288 to move freely about the cage for 15 minutes, at which time they were moved back to  
1289 their original cage. The number of buried and unburied marbles per cage were tallied  
1290 by two independent observers and averaged. Partially buried marbles were counted  
1291 as buried if greater than 60% of the marble was covered with bedding material. All  
1292 group were assessed for outliers which were corrected for using Iterative Grubb's

1293 method. All behavioral studies were in compliance with institutional IACUC protocols  
1294 and took place inside of a biosafety cabinet according to BSL-3 protocols.

1295

### 1296 **RNA fluorescent in-situ hybridization (RNAscope)**

1297 The Fluorescent Multiplex V2 kit (Advanced Cell Diagnostics, CA) was used for  
1298 RNAscope FISH. Specifically, we used the FFPE protocol as detailed in the  
1299 RNAscope Multiplex Fluorescent Reagent Kit v2 Assay User Manual. RNAscope  
1300 probes were as follows: *Rbfox3* (NeuN) for pan-neuronal labeling (Mau-Rbfox3-C1)  
1301 and the Spike gene (S) for SARS-CoV-2 labeling (V-nCoV2019-S-C3). Opal dyes  
1302 (Akoya Biosciences, MA) were used for secondary staining as follows: Opal 690 for  
1303 C1 and Opal 570 for C3. DAPI was used for nuclear staining. Images were taken on  
1304 an LSM880 confocal microscope (Zeiss, GER) with identical parameters between  
1305 mock- and SARS-CoV-2-infected samples.

1306

### 1307 **IRB Statement**

1308 Tissue human samples were provided by the Weill Cornell Medicine Department of  
1309 Pathology. The Tissue Procurement Facility operates under Institutional Review  
1310 Board (IRB) approved protocol and follows guidelines set by Health Insurance  
1311 Portability and Accountability Act (HIPAA). Experiments using samples from human  
1312 subjects were conducted in accordance with local regulations and with the approval  
1313 of the IRB at the Weill Cornell Medicine. The autopsy samples are considered human  
1314 tissue research and were collected under IRB protocols 20-04021814 and 19-  
1315 11021069. All autopsies have consent for research use from next of kin, and these  
1316 studies were determined as exempt by IRB at Weill Cornell Medicine under those  
1317 protocol numbers.

1318

### 1319 **Heart, Lung, Kidney Patient sample collection**

1320 All autopsies are performed with consent of next of kin and permission for retention  
1321 and research use of tissue. Autopsies were performed in a negative pressure room  
1322 with protective equipment including N-95 masks; brain and bone were not obtained  
1323 for safety reasons. All fresh tissues were procured prior to fixation and directly into  
1324 Trizol for downstream RNA extraction. Tissues were collected from lung, kidney, and  
1325 the heart as consent permitted. Post-mortem intervals ranged from less than 24  
1326 hours to 72 hours (with 2 exceptions - one at 4 and one at 7 days - but passing RNA

1327 quality metrics) with an average of 2.5 days. All deceased patient remains were  
1328 refrigerated at 4°C prior to autopsy performance.

1329

### 1330 **Human Heart, Lung, Kidney RNA-sequencing**

1331 For RNA library preparation, all samples' RNA was treated with DNase 1 (Zymo  
1332 Research, Catalog # E1010). Post-DNase digested samples were then put into the  
1333 NEBNext rRNA depletion v2 (Human/Mouse/Rat), Ultra II Directional RNA (10ng),  
1334 and Unique Dual Index Primer Pairs were used following the vendor protocols from  
1335 New England Biolabs. Completed libraries were quantified by Qubit and run on a  
1336 Bioanalyzer for size determination. Libraries were pooled and sent to the WCM  
1337 Genomics Core or HudsonAlpha for final quantification by Qubit fluorometer  
1338 (ThermoFisher Scientific), TapeStation 2200 (Agilent), and qRT-PCR using the Kapa  
1339 Biosystems Illumina library quantification kit.

1340

1341 NYGC RNA sequencing libraries were prepared using the KAPA Hyper Library  
1342 Preparation Kit + RiboErase, HMR (Roche) in accordance with manufacturer's  
1343 recommendations. Briefly, 50-200ng of Total RNA were used for ribosomal depletion  
1344 and fragmentation. Depleted RNA underwent first and second strand cDNA synthesis  
1345 followed by adenylation, and ligation of unique dual indexed adapters. Libraries were  
1346 amplified using 12 cycles of PCR and cleaned-up by magnetic bead purification.  
1347 Final libraries were quantified using fluorescent-based assays including PicoGreen  
1348 (Life Technologies) or Qubit Fluorometer (Invitrogen) and Fragment Analyzer  
1349 (Advanced Analytics) and sequenced on a NovaSeq 6000 sequencer (v1 chemistry)  
1350 with 2x150bp targeting 60M reads per sample.

1351

1352 RNAseq data was processed through the nf-core/rnaseq pipeline (Ewels et al.,  
1353 2020). This workflow involved quality control of the reads with FastQC (Andrews),  
1354 adapter trimming using Trim Galore! (<https://github.com/FelixKrueger/TrimGalore>),  
1355 read alignment with STAR (Dobin et al., 2013), gene quantification with Salmon  
1356 (Patro et al., 2017), duplicate read marking with Picard MarkDuplicates  
1357 (<https://github.com/broadinstitute/picard>), and transcript quantification with StringTie  
1358 (Kovaka et al., 2019). Other quality control measures included RSeQC, Qualimap,  
1359 and dupRadar. Alignment was performed using the GRCh38 build native to nf-core  
1360 and annotation was performed using Gencode Human Release 33 (GRCH38.p13).



1361 Differential expression of genes was calculated by DESeq2 using FeatureCounts  
1362 reads. Differential expression comparisons were done as either COVID high cases  
1363 versus COVID- controls or COVID low cases versus COVID- controls for each tissue  
1364 specifically. COVID viral load designations were assigned after quantification of  
1365 normalized reads mapping to the SARS-CoV-2 genome for each donor. Genes were  
1366 ranked by the following statistic:  $\log_{10}(\text{p-value}) * \text{sign}(\log_2\text{FoldChange})$ . Ranked  
1367 genes were used as input for gene set enrichment analysis (GSEA) on the molecular  
1368 signatures database (MSigDB).

1369

### 1370 **Human Olfactory Bulb and Olfactory Epithelium Sequencing**

1371 Brain tissue and nasal epithelium, including the olfactory epithelium and bulb were  
1372 retrieved under a collaborative effort by the Department of Neuropathology and the  
1373 Department of Otolaryngology at Columbia University Irving Medical Center (New  
1374 York, NY, USA). The study was approved by the ethics and Institutional Review  
1375 Board of Columbia University Medical Center (IRB AAAT0689, AAAS7370). Nasal  
1376 tissues, including olfactory and respiratory epithelium were harvested from the skull  
1377 base using an en-bloc resection of the anterior skull base including the cribriform  
1378 plate. Olfactory epithelium was isolated from the olfactory cleft, spanning turbinate  
1379 and adjacent septal mucosa prior to being preserved in Trizol reagent.

1380 For human OE and OB RNA was extracted from 10mg of tissue per sample using  
1381 Direct-zol RNA kit from Zymo Research (Catalog #R2052). After DNase treatment  
1382 50ng-1ug of total RNA was used to prepare DNA libraries with Truseq RNA Library  
1383 Prep Kit v2 (Illumina) following manufacture's instruction. Libraries were amplified  
1384 using 14 PCR cycles followed by AMPure XP beads purification. Next, libraries were  
1385 quantified with Bioanalyser (Agilent Technologies) and Qubit (Invitrogen) and  
1386 sequenced on NovaSeq 6000 sequencer (Illumina) at Columbia Genome Center.

1387 All resulting fastq files were aligned to the Homo Sapiens genome (GRCh38,  
1388 RefSeq) using the RNA-Seq Alignment application (Basespace, Illumina). Salmon  
1389 files were analyzed using the DESeq2 analysis pipeline (Love et al., 2014). All genes  
1390 with an adjusted p value (p-adj) of <0.1 were considered Differentially Expressed  
1391 Genes (DEGs). Gene Set Enrichment Analysis (GSEA) studies were performed as  
1392 described above in 'Hamster RNA Sequencing'.

1393

1394 **Graphic Creation**

1395 All graphics were created using BioRender and Microsoft Powerpoint.

1396

1397

1398 **REFERENCES**

- 1399 Aiyegbusi, O.L., Hughes, S.E., Turner, G., Rivera, S.C., McMullan, C., Chandan,  
1400 J.S., Haroon, S., Price, G., Davies, E.H., Nirantharakumar, K., et al. (2021).  
1401 Symptoms, complications and management of long COVID: a review. *J R Soc Med*  
1402 *114*, 428-442. 10.1177/01410768211032850.
- 1403 Alexandersen, S., Chamings, A., and Bhatta, T.R. (2020). SARS-CoV-2 genomic and  
1404 subgenomic RNAs in diagnostic samples are not an indicator of active replication.  
1405 *Nat Commun* *11*, 6059. 10.1038/s41467-020-19883-7.
- 1406 Allen, T.C. (2010). Small Airways Disease. *Surg Pathol Clin* *3*, 171-186.  
1407 10.1016/j.path.2010.04.002.
- 1408 Asano, T., Boisson, B., Onodi, F., Matuozzo, D., Moncada-Velez, M., Maglorius  
1409 Renkilaraj, M.R.L., Zhang, P., Meertens, L., Bolze, A., Materna, M., et al. (2021). X-  
1410 linked recessive TLR7 deficiency in ~1% of men under 60 years old with life-  
1411 threatening COVID-19. *Sci Immunol* *6*. 10.1126/sciimmunol.abl4348.
- 1412 Banerjee, A.K., Blanco, M.R., Bruce, E.A., Honson, D.D., Chen, L.M., Chow, A.,  
1413 Bhat, P., Ollikainen, N., Quinodoz, S.A., Loney, C., et al. (2020). SARS-CoV-2  
1414 Disrupts Splicing, Translation, and Protein Trafficking to Suppress Host Defenses.  
1415 *Cell* *183*, 1325-1339 e1321. 10.1016/j.cell.2020.10.004.
- 1416 Bankhead, P., Loughrey, M.B., Fernandez, J.A., Dombrowski, Y., McArt, D.G.,  
1417 Dunne, P.D., McQuaid, S., Gray, R.T., Murray, L.J., Coleman, H.G., et al. (2017).  
1418 QuPath: Open source software for digital pathology image analysis. *Sci Rep* *7*,  
1419 16878. 10.1038/s41598-017-17204-5.
- 1420 Bartsch, Y.C., Wang, C., Zohar, T., Fischinger, S., Atyeo, C., Burke, J.S., Kang, J.,  
1421 Edlow, A.G., Fasano, A., Baden, L.R., et al. (2021). Humoral signatures of protective  
1422 and pathological SARS-CoV-2 infection in children. *Nat Med* *27*, 454-462.  
1423 10.1038/s41591-021-01263-3.
- 1424 Bastard, P., Rosen, L.B., Zhang, Q., Michailidis, E., Hoffmann, H.H., Zhang, Y.,  
1425 Dorgham, K., Philippot, Q., Rosain, J., Beziat, V., et al. (2020). Autoantibodies  
1426 against type I IFNs in patients with life-threatening COVID-19. *Science* *370*.  
1427 10.1126/science.abd4585.
- 1428 Beaud, V., Crottaz-Herbette, S., Dunet, V., Vaucher, J., Bernard-Valnet, R., Du  
1429 Pasquier, R., Bart, P.A., and Clarke, S. (2021). Pattern of cognitive deficits in severe  
1430 COVID-19. *J Neurol Neurosurg Psychiatry* *92*, 567-568. 10.1136/jnnp-2020-325173.
- 1431 Bhopal, S.S., and Bhopal, R. (2020). Sex differential in COVID-19 mortality varies  
1432 markedly by age. *Lancet* *396*, 532-533. 10.1016/S0140-6736(20)31748-7.
- 1433 Blanco-Melo, D., Nilsson-Payant, B.E., Liu, W.C., Uhl, S., Hoagland, D., Moller, R.,  
1434 Jordan, T.X., Oishi, K., Panis, M., Sachs, D., et al. (2020). Imbalanced Host  
1435 Response to SARS-CoV-2 Drives Development of COVID-19. *Cell* *181*, 1036-1045  
1436 e1039. 10.1016/j.cell.2020.04.026.
- 1437 Blasco-Serra, A., Gonzalez-Soler, E.M., Cervera-Ferri, A., Teruel-Marti, V., and  
1438 Valverde-Navarro, A.A. (2017). A standardization of the Novelty-Suppressed Feeding  
1439 Test protocol in rats. *Neurosci Lett* *658*, 73-78. 10.1016/j.neulet.2017.08.019.

- 1440 Bodnoff, S.R., Suranyi-Cadotte, B., Aitken, D.H., Quirion, R., and Meaney, M.J.  
1441 (1988). The effects of chronic antidepressant treatment in an animal model of  
1442 anxiety. *Psychopharmacology (Berl)* 95, 298-302. 10.1007/BF00181937.
- 1443 Bornand, D., Toovey, S., Jick, S.S., and Meier, C.R. (2016). The risk of new onset  
1444 depression in association with influenza--A population-based observational study.  
1445 *Brain Behav Immun* 53, 131-137. 10.1016/j.bbi.2015.12.005.
- 1446 Boudewijns, R., Thibaut, H.J., Kaptein, S.J.F., Li, R., Vergote, V., Seldeslachts, L.,  
1447 Van Weyenbergh, J., De Keyser, C., Bervoets, L., Sharma, S., et al. (2020). STAT2  
1448 signaling restricts viral dissemination but drives severe pneumonia in SARS-CoV-2  
1449 infected hamsters. *Nat Commun* 11, 5838. 10.1038/s41467-020-19684-y.
- 1450 Brouwer, P.J.M., Caniels, T.G., van der Straten, K., Snitselaar, J.L., Aldon, Y.,  
1451 Bangaru, S., Torres, J.L., Okba, N.M.A., Claireaux, M., Kerster, G., et al. (2020).  
1452 Potent neutralizing antibodies from COVID-19 patients define multiple targets of  
1453 vulnerability. *Science* 369, 643-650. 10.1126/science.abc5902.
- 1454 Butler, D., Mozsary, C., Meydan, C., Fook, J., Rosiene, J., Shaiber, A., Danko, D.,  
1455 Afshinnkoo, E., MacKay, M., Sedlazeck, F.J., et al. (2021). Shotgun transcriptome,  
1456 spatial omics, and isothermal profiling of SARS-CoV-2 infection reveals unique host  
1457 responses, viral diversification, and drug interactions. *Nat Commun* 12, 1660.  
1458 10.1038/s41467-021-21361-7.
- 1459 Cantuti-Castelvetri, L., Ojha, R., Pedro, L.D., Djannatian, M., Franz, J., Kuivanen, S.,  
1460 van der Meer, F., Kallio, K., Kaya, T., Anastasina, M., et al. (2020). Neuropilin-1  
1461 facilitates SARS-CoV-2 cell entry and infectivity. *Science* 370, 856-860.  
1462 10.1126/science.abd2985.
- 1463 Carrera, E., and Bogousslavsky, J. (2006). The thalamus and behavior: effects of  
1464 anatomically distinct strokes. *Neurology* 66, 1817-1823.  
1465 10.1212/01.wnl.0000219679.95223.4c.
- 1466 Cox, J., and Witten, I.B. (2019). Striatal circuits for reward learning and decision-  
1467 making. *Nat Rev Neurosci* 20, 482-494. 10.1038/s41583-019-0189-2.
- 1468 Daly, J.L., Simonetti, B., Klein, K., Chen, K.E., Williamson, M.K., Anton-Plagaro, C.,  
1469 Shoemark, D.K., Simon-Gracia, L., Bauer, M., Hollandi, R., et al. (2020). Neuropilin-1  
1470 is a host factor for SARS-CoV-2 infection. *Science* 370, 861-865.  
1471 10.1126/science.abd3072.
- 1472 Darby, I.A., and Hewitson, T.D. (2007). Fibroblast differentiation in wound healing  
1473 and fibrosis. *Int Rev Cytol* 257, 143-179. 10.1016/S0074-7696(07)57004-X.
- 1474 de Melo, G.D., Lazarini, F., Levallois, S., Hautefort, C., Michel, V., Larrous, F.,  
1475 Verillaud, B., Aparicio, C., Wagner, S., Gheusi, G., et al. (2021). COVID-19-related  
1476 anosmia is associated with viral persistence and inflammation in human olfactory  
1477 epithelium and brain infection in hamsters. *Sci Transl Med* 13.  
1478 10.1126/scitranslmed.abf8396.
- 1479 Douaud, G., Lee, S., Alfaro-Almagro, F., Arthofer, C., Wang, C., McCarthy, P.,  
1480 Lange, F., Andersson, J.L.R., Griffanti, L., Duff, E., et al. (2021). Brain imaging before  
1481 and after COVID-19 in UK Biobank. medRxiv. 10.1101/2021.06.11.21258690.
- 1482 Eddy, A.A. (2005). Progression in chronic kidney disease. *Adv Chronic Kidney Dis*  
1483 12, 353-365. 10.1053/j.ackd.2005.07.011.
- 1484 Euston, D.R., Gruber, A.J., and McNaughton, B.L. (2012). The role of medial  
1485 prefrontal cortex in memory and decision making. *Neuron* 76, 1057-1070.  
1486 10.1016/j.neuron.2012.12.002.
- 1487 Feng, L., Motelow, J.E., Ma, C., Biche, W., McCafferty, C., Smith, N., Liu, M., Zhan,  
1488 Q., Jia, R., Xiao, B., et al. (2017). Seizures and Sleep in the Thalamus: Focal Limbic

1489 Seizures Show Divergent Activity Patterns in Different Thalamic Nuclei. *J Neurosci*  
1490 37, 11441-11454. 10.1523/JNEUROSCI.1011-17.2017.

1491 Fukuoka, J., Franks, T.J., Colby, T.V., Flaherty, K.R., Galvin, J.R., Hayden, D.,  
1492 Gochuico, B.R., Kazerooni, E.A., Martinez, F., and Travis, W.D. (2005).  
1493 Peribronchiolar metaplasia: a common histologic lesion in diffuse lung disease and a  
1494 rare cause of interstitial lung disease: clinicopathologic features of 15 cases. *Am J*  
1495 *Surg Pathol* 29, 948-954. 10.1097/01.pas.0000168177.71405.ac.

1496 Garcia-Beltran, W.F., Lam, E.C., Astudillo, M.G., Yang, D., Miller, T.E., Feldman, J.,  
1497 Hauser, B.M., Caradonna, T.M., Clayton, K.L., Nitido, A.D., et al. (2021). COVID-19-  
1498 neutralizing antibodies predict disease severity and survival. *Cell* 184, 476-488 e411.  
1499 10.1016/j.cell.2020.12.015.

1500 Gheusi, G., Cremer, H., McLean, H., Chazal, G., Vincent, J.D., and Lledo, P.M.  
1501 (2000). Importance of newly generated neurons in the adult olfactory bulb for odor  
1502 discrimination. *Proc Natl Acad Sci U S A* 97, 1823-1828. 10.1073/pnas.97.4.1823.

1503 Grant, R.A., Morales-Nebreda, L., Markov, N.S., Swaminathan, S., Querrey, M.,  
1504 Guzman, E.R., Abbott, D.A., Donnelly, H.K., Donayre, A., Goldberg, I.A., et al.  
1505 (2021). Circuits between infected macrophages and T cells in SARS-CoV-2  
1506 pneumonia. *Nature* 590, 635-641. 10.1038/s41586-020-03148-w.

1507 Greicius, M.D., Flores, B.H., Menon, V., Glover, G.H., Solvason, H.B., Kenna, H.,  
1508 Reiss, A.L., and Schatzberg, A.F. (2007). Resting-state functional connectivity in  
1509 major depression: abnormally increased contributions from subgenual cingulate  
1510 cortex and thalamus. *Biol Psychiatry* 62, 429-437. 10.1016/j.biopsych.2006.09.020.

1511 Grossman, E.J., Ge, Y., Jensen, J.H., Babb, J.S., Miles, L., Reaume, J., Silver, J.M.,  
1512 Grossman, R.I., and Inglese, M. (2012). Thalamus and cognitive impairment in mild  
1513 traumatic brain injury: a diffusional kurtosis imaging study. *J Neurotrauma* 29, 2318-  
1514 2327. 10.1089/neu.2011.1763.

1515 Guarnieri, L.O., Pereira-Caixeta, A.R., Medeiros, D.C., Aquino, N.S.S., Szawka, R.E.,  
1516 Mendes, E., Moraes, M.F.D., and Pereira, G.S. (2020). Pro-neurogenic effect of  
1517 fluoxetine in the olfactory bulb is concomitant to improvements in social memory and  
1518 depressive-like behavior of socially isolated mice. *Transl Psychiatry* 10, 33.  
1519 10.1038/s41398-020-0701-5.

1520 Gustin, S.M., Wrigley, P.J., Youssef, A.M., McIndoe, L., Wilcox, S.L., Rae, C.D.,  
1521 Edden, R.A.E., Siddall, P.J., and Henderson, L.A. (2014). Thalamic activity and  
1522 biochemical changes in individuals with neuropathic pain after spinal cord injury. *Pain*  
1523 155, 1027-1036. 10.1016/j.pain.2014.02.008.

1524 Hadjadj, J., Yatim, N., Barnabei, L., Corneau, A., Boussier, J., Smith, N., Pere, H.,  
1525 Charbit, B., Bondet, V., Chenevier-Gobeaux, C., et al. (2020). Impaired type I  
1526 interferon activity and inflammatory responses in severe COVID-19 patients. *Science*  
1527 369, 718-724. 10.1126/science.abc6027.

1528 Hasegawa-Ishii, S., Shimada, A., and Imamura, F. (2017). Lipopolysaccharide-  
1529 initiated persistent rhinitis causes gliosis and synaptic loss in the olfactory bulb. *Sci*  
1530 *Rep* 7, 11605. 10.1038/s41598-017-10229-w.

1531 Hasegawa-Ishii, S., Shimada, A., and Imamura, F. (2019). Neuroplastic changes in  
1532 the olfactory bulb associated with nasal inflammation in mice. *J Allergy Clin Immunol*  
1533 143, 978-989 e973. 10.1016/j.jaci.2018.09.028.

1534 He, Y., Taylor, N., Yao, X., and Bhattacharya, A. (2021). Mouse primary microglia  
1535 respond differently to LPS and poly(I:C) in vitro. *Sci Rep* 11, 10447. 10.1038/s41598-  
1536 021-89777-1.

1537 Hellweg, R., Zueger, M., Fink, K., Hortnagl, H., and Gass, P. (2007). Olfactory  
1538 bulbectomy in mice leads to increased BDNF levels and decreased serotonin

- 1539 turnover in depression-related brain areas. *Neurobiol Dis* 25, 1-7.  
1540 10.1016/j.nbd.2006.07.017.
- 1541 Hoagland, D.A., Moller, R., Uhl, S.A., Oishi, K., Frere, J., Golyner, I., Horiuchi, S.,  
1542 Panis, M., Blanco-Melo, D., Sachs, D., et al. (2021). Leveraging the antiviral type I  
1543 interferon system as a first line of defense against SARS-CoV-2 pathogenicity.  
1544 *Immunity* 54, 557-570 e555. 10.1016/j.immuni.2021.01.017.
- 1545 Hodaie, M., Wennberg, R.A., Dostrovsky, J.O., and Lozano, A.M. (2002). Chronic  
1546 anterior thalamus stimulation for intractable epilepsy. *Epilepsia* 43, 603-608.  
1547 10.1046/j.1528-1157.2002.26001.x.
- 1548 Hoffmann, M., Kleine-Weber, H., Schroeder, S., Kruger, N., Herrler, T., Erichsen, S.,  
1549 Schiergens, T.S., Herrler, G., Wu, N.H., Nitsche, A., et al. (2020). SARS-CoV-2 Cell  
1550 Entry Depends on ACE2 and TMPRSS2 and Is Blocked by a Clinically Proven  
1551 Protease Inhibitor. *Cell* 181, 271-280 e278. 10.1016/j.cell.2020.02.052.
- 1552 Hogan, B.L., Barkauskas, C.E., Chapman, H.A., Epstein, J.A., Jain, R., Hsia, C.C.,  
1553 Niklason, L., Calle, E., Le, A., Randell, S.H., et al. (2014). Repair and regeneration of  
1554 the respiratory system: complexity, plasticity, and mechanisms of lung stem cell  
1555 function. *Cell Stem Cell* 15, 123-138. 10.1016/j.stem.2014.07.012.
- 1556 Horiuchi, S., Oishi, K., Carrau, L., Frere, J., Moller, R., Panis, M., and tenOever, B.R.  
1557 (2021). Immune memory from SARS-CoV-2 infection in hamsters provides variant-  
1558 independent protection but still allows virus transmission. *Sci Immunol* 6, eabm3131.  
1559 10.1126/sciimmunol.abm3131.
- 1560 Hosp, J.A., Dressing, A., Blazhenets, G., Bormann, T., Rau, A., Schwabenland, M.,  
1561 Thurow, J., Wagner, D., Waller, C., Niesen, W.D., et al. (2021). Cognitive impairment  
1562 and altered cerebral glucose metabolism in the subacute stage of COVID-19. *Brain*  
1563 144, 1263-1276. 10.1093/brain/awab009.
- 1564 Hu, B., Guo, H., Zhou, P., and Shi, Z.L. (2021). Characteristics of SARS-CoV-2 and  
1565 COVID-19. *Nat Rev Microbiol* 19, 141-154. 10.1038/s41579-020-00459-7.
- 1566 Huang, L., Yao, Q., Gu, X., Wang, Q., Ren, L., Wang, Y., Hu, P., Guo, L., Liu, M., Xu,  
1567 J., et al. (2021). 1-year outcomes in hospital survivors with COVID-19: a longitudinal  
1568 cohort study. *Lancet* 398, 747-758. 10.1016/S0140-6736(21)01755-4.
- 1569 Iadarola, M.J., Max, M.B., Berman, K.F., Byas-Smith, M.G., Coghill, R.C., Gracely,  
1570 R.H., and Bennett, G.J. (1995). Unilateral decrease in thalamic activity observed with  
1571 positron emission tomography in patients with chronic neuropathic pain. *Pain* 63, 55-  
1572 64. 10.1016/0304-3959(95)00015-K.
- 1573 Imai, M., Iwatsuki-Horimoto, K., Hatta, M., Loeber, S., Halfmann, P.J., Nakajima, N.,  
1574 Watanabe, T., Ujie, M., Takahashi, K., Ito, M., et al. (2020). Syrian hamsters as a  
1575 small animal model for SARS-CoV-2 infection and countermeasure development.  
1576 *Proc Natl Acad Sci U S A* 117, 16587-16595. 10.1073/pnas.2009799117.
- 1577 Jimenez-Gomez, C., Osentoski, A., and Woods, J.H. (2011). Pharmacological  
1578 evaluation of the adequacy of marble burying as an animal model of compulsion  
1579 and/or anxiety. *Behav Pharmacol* 22, 711-713. 10.1097/FBP.0b013e32834afebe.
- 1580 Kelly, J.P., Wrynn, A.S., and Leonard, B.E. (1997). The olfactory bulbectomized rat  
1581 as a model of depression: an update. *Pharmacol Ther* 74, 299-316. 10.1016/s0163-  
1582 7258(97)00004-1.
- 1583 Kovaka, S., Zimin, A.V., Pertea, G.M., Razaghi, R., Salzberg, S.L., and Pertea, M.  
1584 (2019). Transcriptome assembly from long-read RNA-seq alignments with StringTie2.  
1585 *Genome Biol* 20, 278. 10.1186/s13059-019-1910-1.
- 1586 Kuleshov, M.V., Jones, M.R., Rouillard, A.D., Fernandez, N.F., Duan, Q., Wang, Z.,  
1587 Koplev, S., Jenkins, S.L., Jagodnik, K.M., Lachmann, A., et al. (2016). Enrichr: a

1588 comprehensive gene set enrichment analysis web server 2016 update. *Nucleic Acids*  
1589 *Res* 44, W90-97. 10.1093/nar/gkw377.

1590 Lamers, M.M., Beumer, J., van der Vaart, J., Knoops, K., Puschhof, J., Breugem,  
1591 T.I., Ravelli, R.B.G., Paul van Schayck, J., Mykytyn, A.Z., Duimel, H.Q., et al. (2020).  
1592 SARS-CoV-2 productively infects human gut enterocytes. *Science* 369, 50-54.  
1593 10.1126/science.abc1669.

1594 Lazarini, F., Katsimpardi, L., Levivien, S., Wagner, S., Gressens, P., Teissier, N., and  
1595 Lledo, P.M. (2018). Congenital Cytomegalovirus Infection Alters Olfaction Before  
1596 Hearing Deterioration In Mice. *J Neurosci* 38, 10424-10437.  
1597 10.1523/JNEUROSCI.0740-18.2018.

1598 Li, M., Wang, R., Zhao, M., Zhai, J., Liu, B., Yu, D., and Yuan, K. (2019).  
1599 Abnormalities of thalamus volume and resting state functional connectivity in primary  
1600 insomnia patients. *Brain Imaging Behav* 13, 1193-1201. 10.1007/s11682-018-9932-y.

1601 Love, M.I., Huber, W., and Anders, S. (2014). Moderated estimation of fold change  
1602 and dispersion for RNA-seq data with DESeq2. *Genome Biol* 15, 550.  
1603 10.1186/s13059-014-0550-8.

1604 Lucas, C., Wong, P., Klein, J., Castro, T.B.R., Silva, J., Sundaram, M., Ellingson,  
1605 M.K., Mao, T., Oh, J.E., Israelow, B., et al. (2020). Longitudinal analyses reveal  
1606 immunological misfiring in severe COVID-19. *Nature* 584, 463-469. 10.1038/s41586-  
1607 020-2588-y.

1608 Magalhaes, R., Novais, A., Barriere, D.A., Marques, P., Marques, F., Sousa, J.C.,  
1609 Cerqueira, J.J., Cachia, A., Jay, T.M., Bottlaender, M., et al. (2019). A Resting-State  
1610 Functional MR Imaging and Spectroscopy Study of the Dorsal Hippocampus in the  
1611 Chronic Unpredictable Stress Rat Model. *J Neurosci* 39, 3640-3650.  
1612 10.1523/JNEUROSCI.2192-18.2019.

1613 Mootha, V.K., Lindgren, C.M., Eriksson, K.F., Subramanian, A., Sihag, S., Lehar, J.,  
1614 Puigserver, P., Carlsson, E., Ridderstrale, M., Laurila, E., et al. (2003). PGC-1alpha-  
1615 responsive genes involved in oxidative phosphorylation are coordinately  
1616 downregulated in human diabetes. *Nat Genet* 34, 267-273. 10.1038/ng1180.

1617 Nalbandian, A., Sehgal, K., Gupta, A., Madhavan, M.V., McGroder, C., Stevens, J.S.,  
1618 Cook, J.R., Nordvig, A.S., Shalev, D., Sehrawat, T.S., et al. (2021). Post-acute  
1619 COVID-19 syndrome. *Nat Med* 27, 601-615. 10.1038/s41591-021-01283-z.

1620 Nilsson-Payant, B.E., Uhl, S., Grimont, A., Doane, A.S., Cohen, P., Patel, R.S.,  
1621 Higgins, C.A., Acklin, J.A., Bram, Y., Chandar, V., et al. (2021). The NF-kappaB  
1622 Transcriptional Footprint Is Essential for SARS-CoV-2 Replication. *J Virol* 95,  
1623 e0125721. 10.1128/JVI.01257-21.

1624 Nosedá, R., Borsook, D., and Burstein, R. (2017). Neuropeptides and  
1625 Neurotransmitters That Modulate Thalamo-Cortical Pathways Relevant to Migraine  
1626 Headache. *Headache* 57 Suppl 2, 97-111. 10.1111/head.13083.

1627 Oathes, D.J., Patenaude, B., Schatzberg, A.F., and Etkin, A. (2015). Neurobiological  
1628 signatures of anxiety and depression in resting-state functional magnetic resonance  
1629 imaging. *Biol Psychiatry* 77, 385-393. 10.1016/j.biopsych.2014.08.006.

1630 Perlman, S., Ries, D., Bolger, E., Chang, L.J., and Stoltzfus, C.M. (1986). MHV  
1631 nucleocapsid synthesis in the presence of cycloheximide and accumulation of  
1632 negative strand MHV RNA. *Virus Res* 6, 261-272. 10.1016/0168-1702(86)90074-2.

1633 Plaisier, S.B., Taschereau, R., Wong, J.A., and Graeber, T.G. (2010). Rank-rank  
1634 hypergeometric overlap: identification of statistically significant overlap between  
1635 gene-expression signatures. *Nucleic Acids Res* 38, e169. 10.1093/nar/gkq636.

1636 Porsolt, R.D., Bertin, A., and Jalfre, M. (1977). Behavioral despair in mice: a primary  
1637 screening test for antidepressants. *Arch Int Pharmacodyn Ther* 229, 327-336.

1638 Puelles, V.G., Lutgehetmann, M., Lindenmeyer, M.T., Sperhake, J.P., Wong, M.N.,  
1639 Allweiss, L., Chilla, S., Heinemann, A., Wanner, N., Liu, S., et al. (2020). Multiorgan  
1640 and Renal Tropism of SARS-CoV-2. *N Engl J Med* 383, 590-592.  
1641 10.1056/NEJMc2011400.  
1642 Rangaprakash, D., Deshpande, G., Daniel, T.A., Goodman, A.M., Robinson, J.L.,  
1643 Salibi, N., Katz, J.S., Denney, T.S., Jr., and Dretsch, M.N. (2017). Compromised  
1644 hippocampus-striatum pathway as a potential imaging biomarker of mild-traumatic  
1645 brain injury and posttraumatic stress disorder. *Hum Brain Mapp* 38, 2843-2864.  
1646 10.1002/hbm.23551.  
1647 Reimand, J., Isserlin, R., Voisin, V., Kucera, M., Tannus-Lopes, C., Rostamianfar, A.,  
1648 Wadi, L., Meyer, M., Wong, J., Xu, C., et al. (2019). Pathway enrichment analysis  
1649 and visualization of omics data using g:Profiler, GSEA, Cytoscape and  
1650 EnrichmentMap. *Nat Protoc* 14, 482-517. 10.1038/s41596-018-0103-9.  
1651 Satterfield, B.A., Bhatt, D.L., and Gersh, B.J. (2021). Cardiac involvement in the long-  
1652 term implications of COVID-19. *Nat Rev Cardiol*. 10.1038/s41569-021-00631-3.  
1653 Schelling, J.R. (2016). Tubular atrophy in the pathogenesis of chronic kidney disease  
1654 progression. *Pediatr Nephrol* 31, 693-706. 10.1007/s00467-015-3169-4.  
1655 Schneider, C.A., Rasband, W.S., and Eliceiri, K.W. (2012). NIH Image to ImageJ: 25  
1656 years of image analysis. *Nat Methods* 9, 671-675. 10.1038/nmeth.2089.  
1657 Schoonheim, M.M., Hulst, H.E., Brandt, R.B., Strik, M., Wink, A.M., Uitdehaag, B.M.,  
1658 Barkhof, F., and Geurts, J.J. (2015). Thalamus structure and function determine  
1659 severity of cognitive impairment in multiple sclerosis. *Neurology* 84, 776-783.  
1660 10.1212/WNL.0000000000001285.  
1661 Schubert, K., Karousis, E.D., Jomaa, A., Scaiola, A., Echeverria, B., Gurzeler, L.A.,  
1662 Leibundgut, M., Thiel, V., Muhlemann, O., and Ban, N. (2020). SARS-CoV-2 Nsp1  
1663 binds the ribosomal mRNA channel to inhibit translation. *Nat Struct Mol Biol* 27, 959-  
1664 966. 10.1038/s41594-020-0511-8.  
1665 Serafini, R.A., Pryce, K.D., and Zachariou, V. (2020). The Mesolimbic Dopamine  
1666 System in Chronic Pain and Associated Affective Comorbidities. *Biol Psychiatry* 87,  
1667 64-73. 10.1016/j.biopsych.2019.10.018.  
1668 Sia, S.F., Yan, L.M., Chin, A.W.H., Fung, K., Choy, K.T., Wong, A.Y.L.,  
1669 Kaewpreedee, P., Perera, R., Poon, L.L.M., Nicholls, J.M., et al. (2020).  
1670 Pathogenesis and transmission of SARS-CoV-2 in golden hamsters. *Nature* 583,  
1671 834-838. 10.1038/s41586-020-2342-5.  
1672 Song, C., and Leonard, B.E. (2005). The olfactory bulbectomized rat as a model of  
1673 depression. *Neurosci Biobehav Rev* 29, 627-647. 10.1016/j.neubiorev.2005.03.010.  
1674 Stone, R.C., Pastar, I., Ojeh, N., Chen, V., Liu, S., Garzon, K.I., and Tomic-Canic, M.  
1675 (2016). Epithelial-mesenchymal transition in tissue repair and fibrosis. *Cell Tissue*  
1676 *Res* 365, 495-506. 10.1007/s00441-016-2464-0.  
1677 Stratiniaki, M., Varidaki, A., Mitsi, V., Ghose, S., Magida, J., Dias, C., Russo, S.J.,  
1678 Vialou, V., Caldarone, B.J., Tamminga, C.A., et al. (2013). Regulator of G protein  
1679 signaling 4 [corrected] is a crucial modulator of antidepressant drug action in  
1680 depression and neuropathic pain models. *Proc Natl Acad Sci U S A* 110, 8254-8259.  
1681 10.1073/pnas.1214696110.  
1682 Subramanian, A., Tamayo, P., Mootha, V.K., Mukherjee, S., Ebert, B.L., Gillette,  
1683 M.A., Paulovich, A., Pomeroy, S.L., Golub, T.R., Lander, E.S., and Mesirov, J.P.  
1684 (2005). Gene set enrichment analysis: a knowledge-based approach for interpreting  
1685 genome-wide expression profiles. *Proc Natl Acad Sci U S A* 102, 15545-15550.  
1686 10.1073/pnas.0506580102.

1687 Sudre, C.H., Murray, B., Varsavsky, T., Graham, M.S., Penfold, R.S., Bowyer, R.C.,  
1688 Pujol, J.C., Klaser, K., Antonelli, M., Canas, L.S., et al. (2021). Attributes and  
1689 predictors of long COVID. *Nat Med* 27, 626-631. 10.1038/s41591-021-01292-y.  
1690 Taquet, M., Luciano, S., Geddes, J.R., and Harrison, P.J. (2021). Bidirectional  
1691 associations between COVID-19 and psychiatric disorder: retrospective cohort  
1692 studies of 62 354 COVID-19 cases in the USA. *Lancet Psychiatry* 8, 130-140.  
1693 10.1016/S2215-0366(20)30462-4.  
1694 Taylor, G.R., Haward, S., Noble, J.S., and Murday, V. (1992). Isolation and  
1695 sequencing of CA/GT repeat microsatellites from chromosomal libraries without  
1696 subcloning. *Anal Biochem* 200, 125-129. 10.1016/0003-2697(92)90287-h.  
1697 Thalakoti, S., Patil, V.V., Damodaram, S., Vause, C.V., Langford, L.E., Freeman,  
1698 S.E., and Durham, P.L. (2007). Neuron-glia signaling in trigeminal ganglion:  
1699 implications for migraine pathology. *Headache* 47, 1008-1023; discussion 1024-  
1700 1005. 10.1111/j.1526-4610.2007.00854.x.  
1701 Thoms, M., Buschauer, R., Ameisemeier, M., Koepke, L., Denk, T., Hirschenberger,  
1702 M., Kratzat, H., Hayn, M., Mackens-Kiani, T., Cheng, J., et al. (2020). Structural basis  
1703 for translational shutdown and immune evasion by the Nsp1 protein of SARS-CoV-2.  
1704 *Science* 369, 1249-1255. 10.1126/science.abc8665.  
1705 Torres-Sanchez, S., Perez-Caballero, L., and Berrococo, E. (2017). Cellular and  
1706 molecular mechanisms triggered by Deep Brain Stimulation in depression: A  
1707 preclinical and clinical approach. *Prog Neuropsychopharmacol Biol Psychiatry* 73, 1-  
1708 10. 10.1016/j.pnpbp.2016.09.005.  
1709 Wang, Z., Jia, X., Liang, P., Qi, Z., Yang, Y., Zhou, W., and Li, K. (2012). Changes in  
1710 thalamus connectivity in mild cognitive impairment: evidence from resting state fMRI.  
1711 *Eur J Radiol* 81, 277-285. 10.1016/j.ejrad.2010.12.044.  
1712 Wiersinga, W.J., Rhodes, A., Cheng, A.C., Peacock, S.J., and Prescott, H.C. (2020).  
1713 Pathophysiology, Transmission, Diagnosis, and Treatment of Coronavirus Disease  
1714 2019 (COVID-19): A Review. *JAMA* 324, 782-793. 10.1001/jama.2020.12839.  
1715 Wright, J.L., Churg, A., Hague, C.J., Wong, A., and Ryerson, C.J. (2020). Pathologic  
1716 separation of idiopathic pulmonary fibrosis from fibrotic hypersensitivity pneumonitis.  
1717 *Mod Pathol* 33, 616-625. 10.1038/s41379-019-0389-3.  
1718 Yamashita, N., Kusaba, T., Nakata, T., Tomita, A., Ida, T., Watanabe-Uehara, N.,  
1719 Ikeda, K., Kitani, T., Uehara, M., Kirita, Y., et al. (2020). Intratubular epithelial-  
1720 mesenchymal transition and tubular atrophy after kidney injury in mice. *Am J Physiol*  
1721 *Renal Physiol* 319, F579-F591. 10.1152/ajprenal.00108.2020.  
1722 Yanai, S., and Endo, S. (2021). Functional Aging in Male C57BL/6J Mice Across the  
1723 Life-Span: A Systematic Behavioral Analysis of Motor, Emotional, and Memory  
1724 Function to Define an Aging Phenotype. *Front Aging Neurosci* 13, 697621.  
1725 10.3389/fnagi.2021.697621.  
1726 Yang, L., Han, Y., Nilsson-Payant, B.E., Gupta, V., Wang, P., Duan, X., Tang, X.,  
1727 Zhu, J., Zhao, Z., Jaffre, F., et al. (2020). A Human Pluripotent Stem Cell-based  
1728 Platform to Study SARS-CoV-2 Tropism and Model Virus Infection in Human Cells  
1729 and Organoids. *Cell Stem Cell* 27, 125-136 e127. 10.1016/j.stem.2020.06.015.  
1730 Yuki, K., Fujiogi, M., and Koutsogiannaki, S. (2020). COVID-19 pathophysiology: A  
1731 review. *Clin Immunol* 215, 108427. 10.1016/j.clim.2020.108427.  
1732 Zazhytska, M., Kodra, A., Hoagland, D.A., Fullard, J.F., Shayya, H., Omer, A.,  
1733 Firestein, S., Gong, Q., Canoll, P.D., Goldman, J.E., et al. (2021). Disruption of  
1734 nuclear architecture as a cause of COVID-19 induced anosmia. *bioRxiv*.  
1735 10.1101/2021.02.09.430314.



1736 Zhang, Y., Chen, K., Sloan, S.A., Bennett, M.L., Scholze, A.R., O'Keefe, S.,  
1737 Phatnani, H.P., Guarnieri, P., Caneda, C., Ruderisch, N., et al. (2014). An RNA-  
1738 sequencing transcriptome and splicing database of glia, neurons, and vascular cells  
1739 of the cerebral cortex. *J Neurosci* 34, 11929-11947. 10.1523/JNEUROSCI.1860-  
1740 14.2014.  
1741 Zhu, N., Zhang, D., Wang, W., Li, X., Yang, B., Song, J., Zhao, X., Huang, B., Shi,  
1742 W., Lu, R., et al. (2020). A Novel Coronavirus from Patients with Pneumonia in  
1743 China, 2019. *N Engl J Med* 382, 727-733. 10.1056/NEJMoa2001017.  
1744

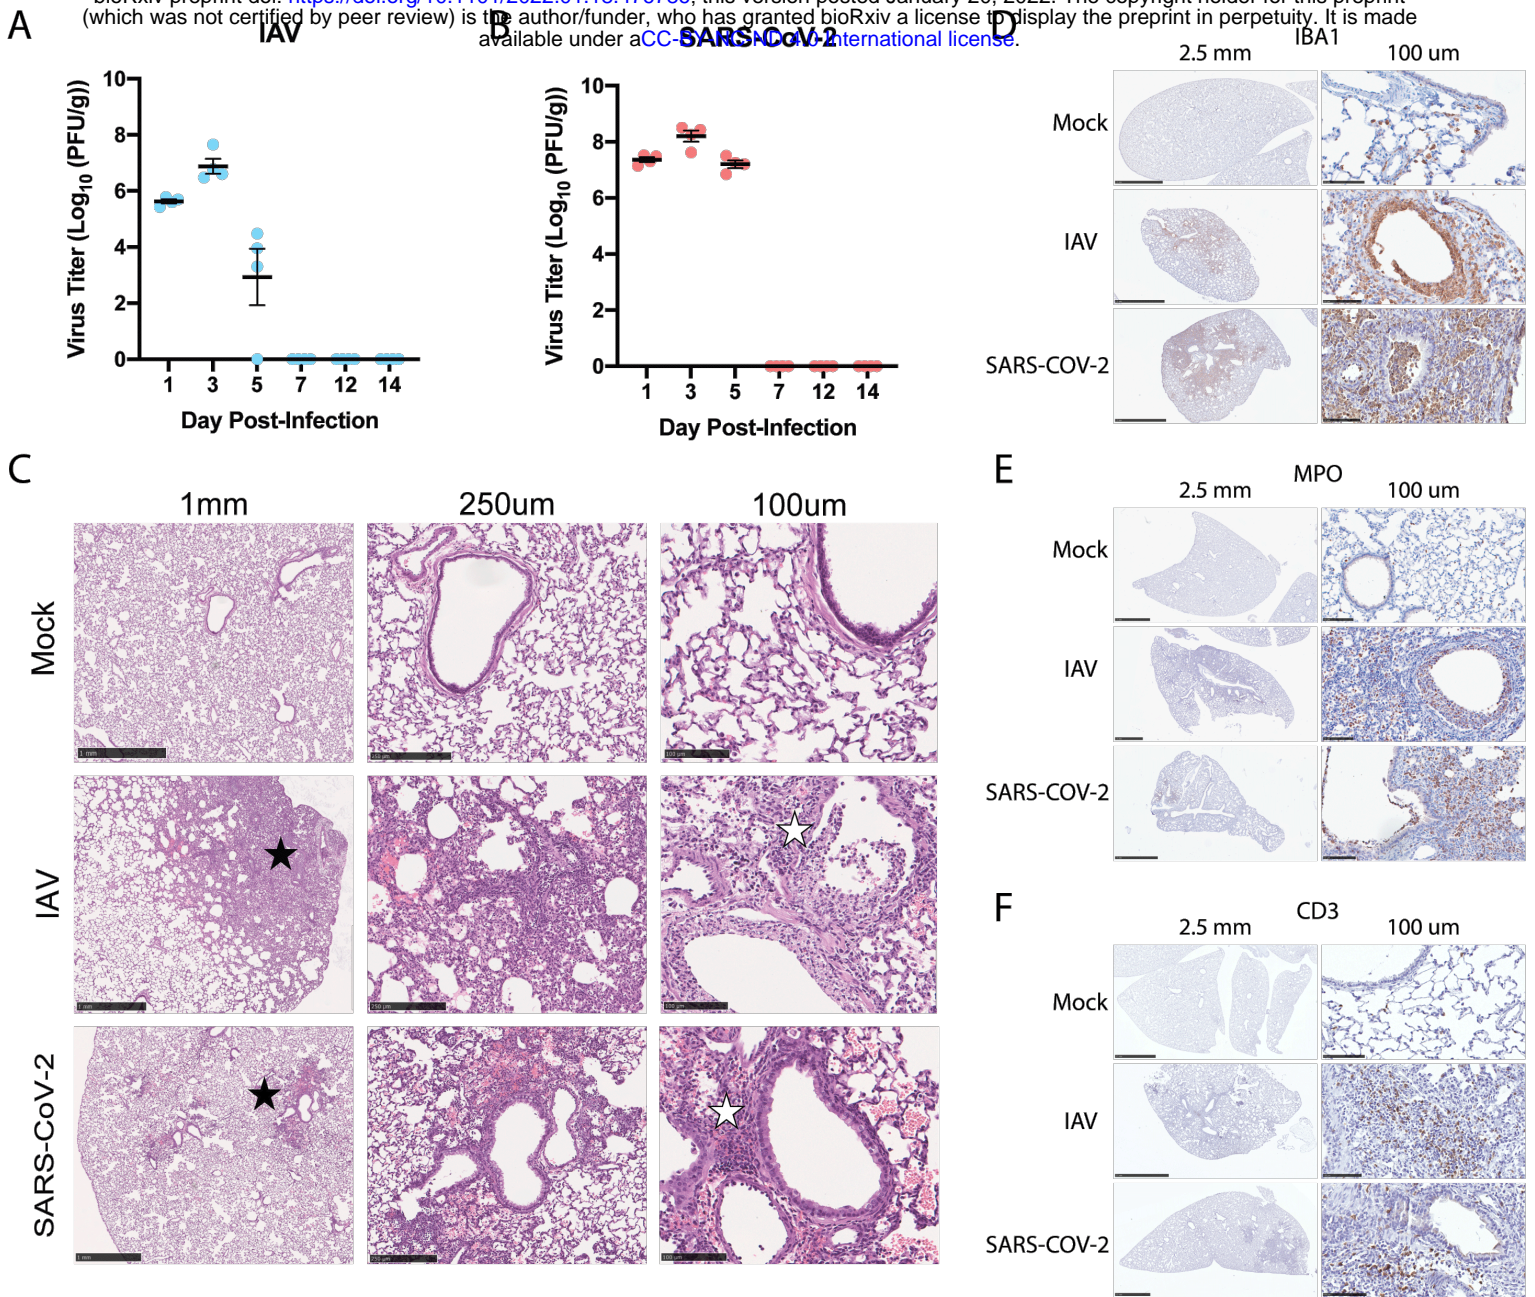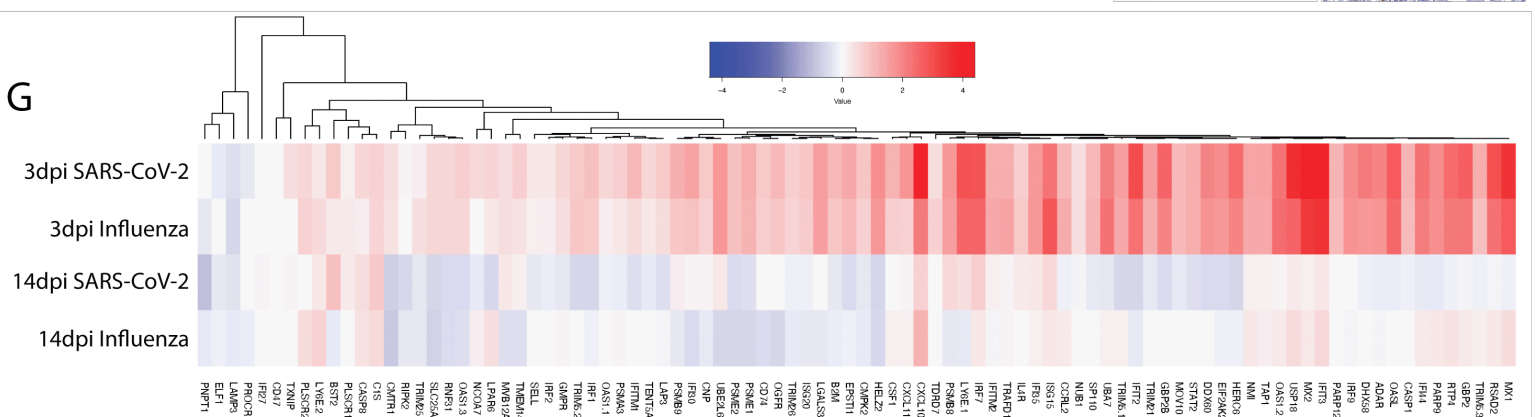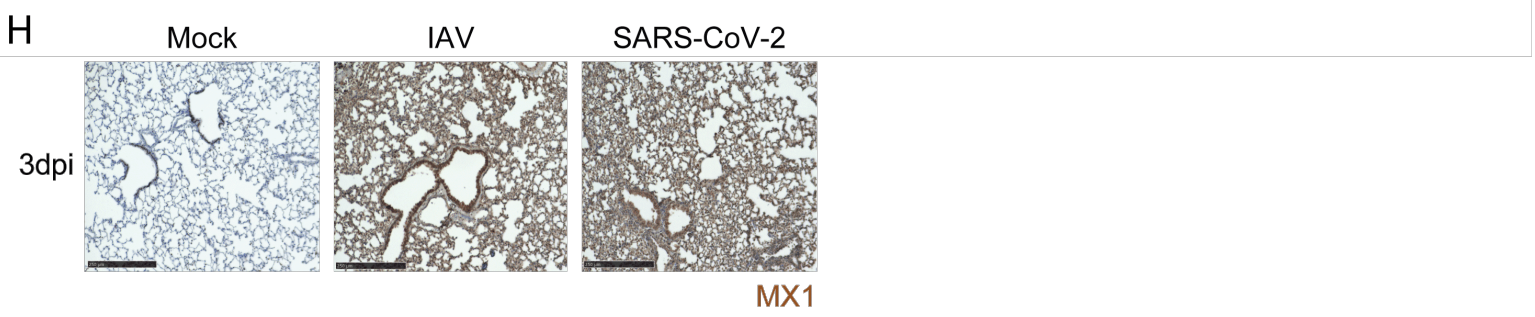

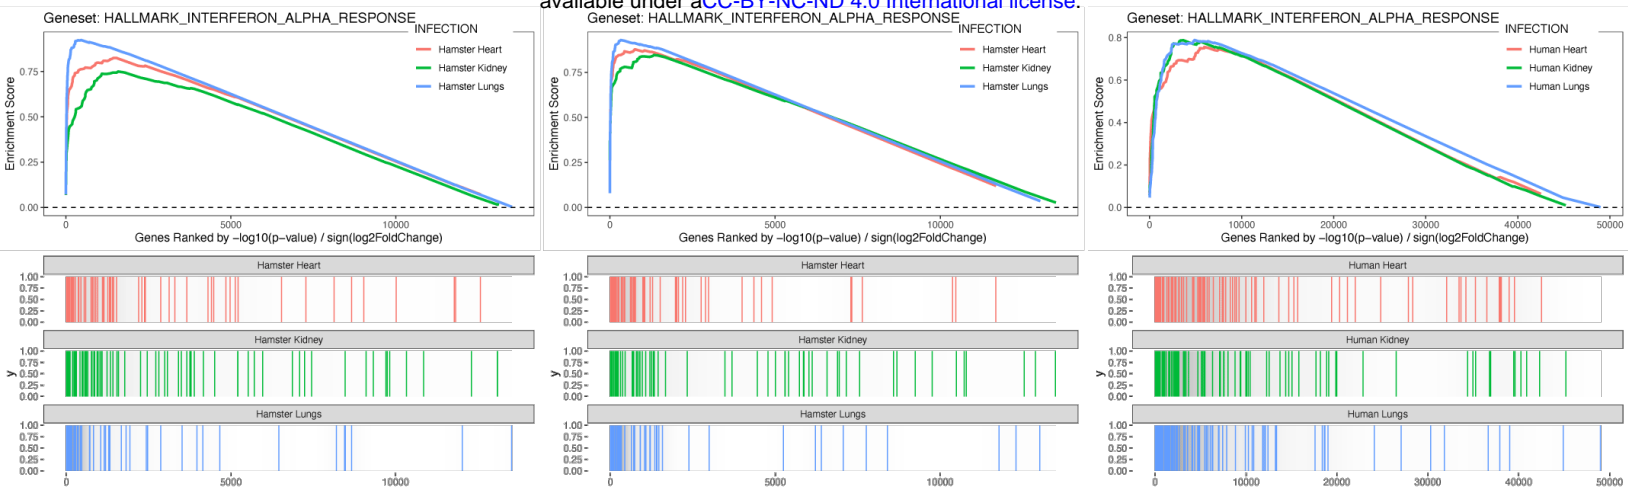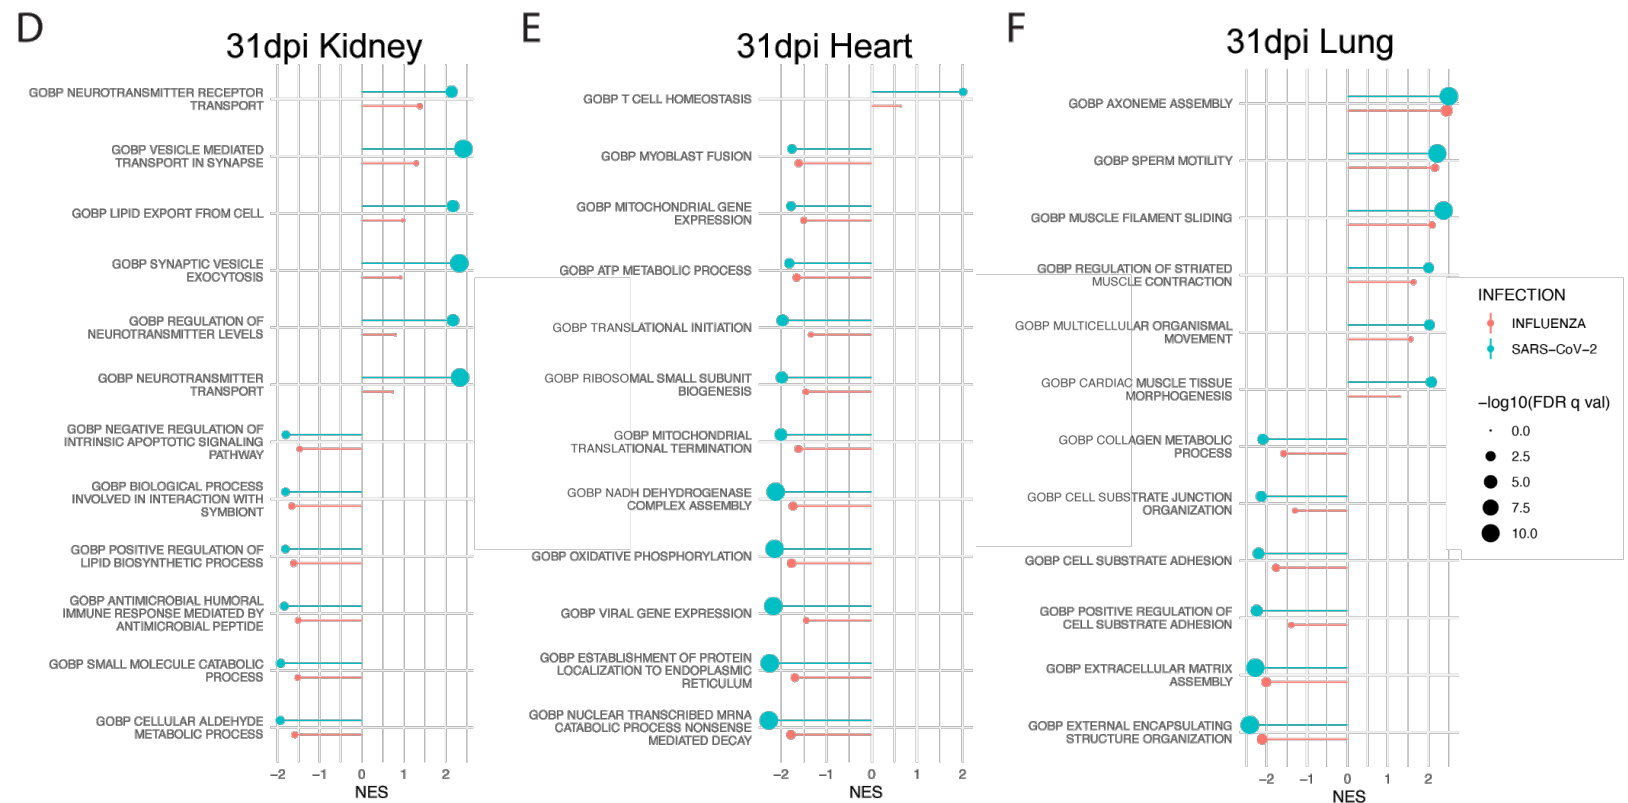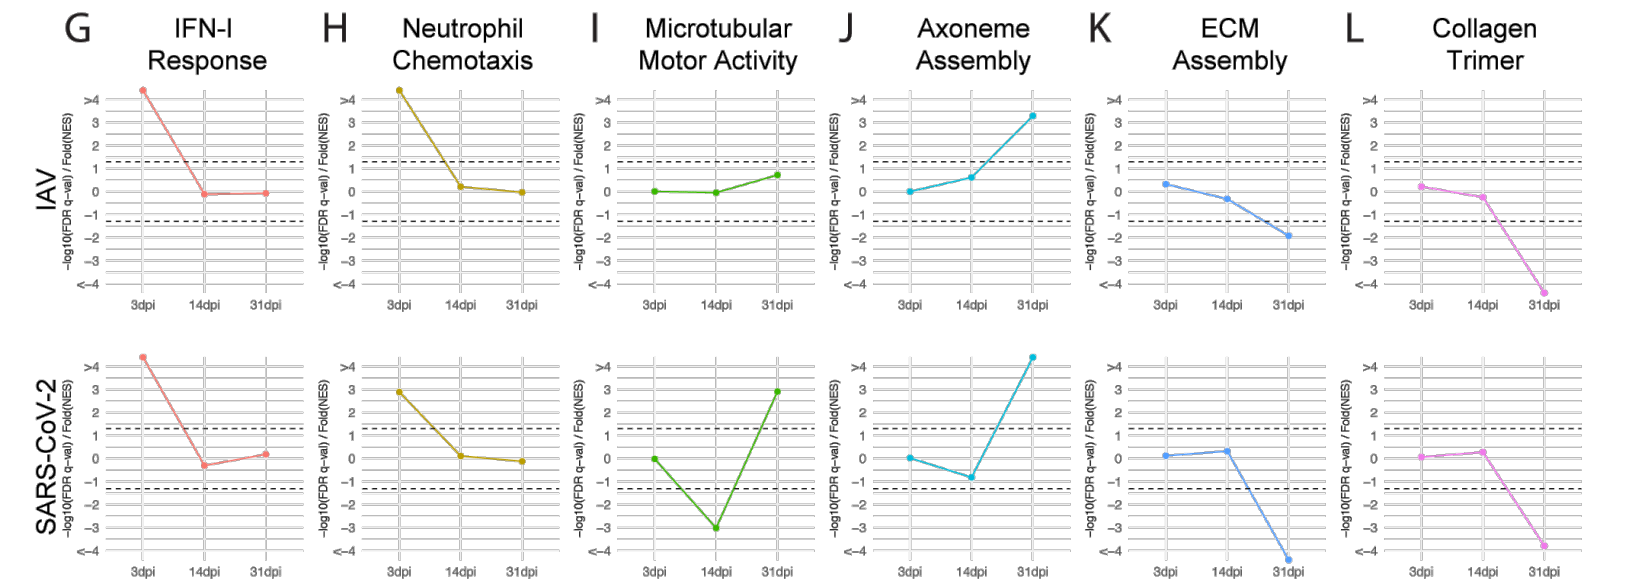

A

2.5mm

250µm

100µm

100µm

Mock

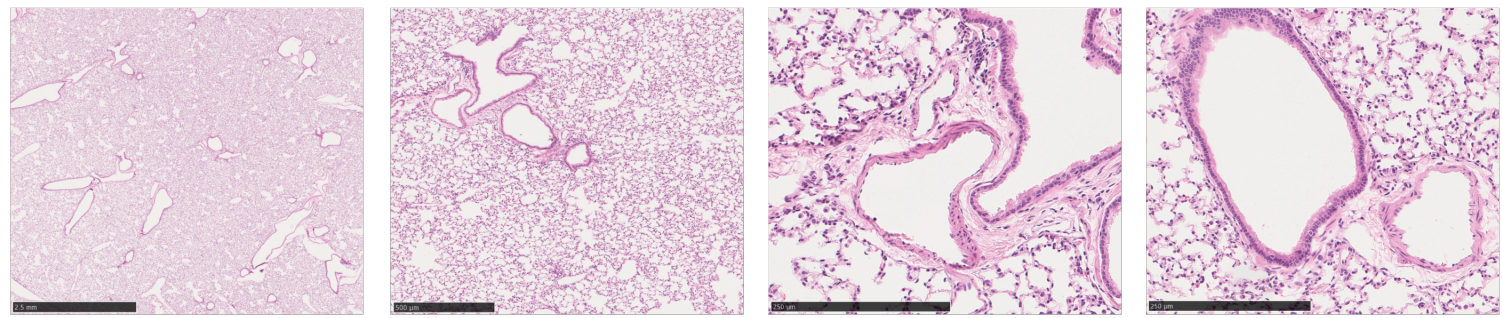

IAV

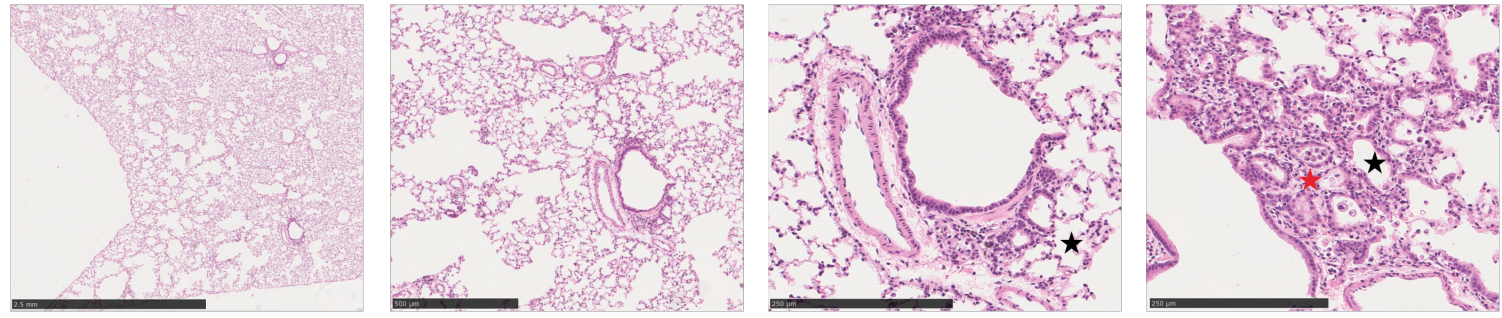

SARS-CoV-2

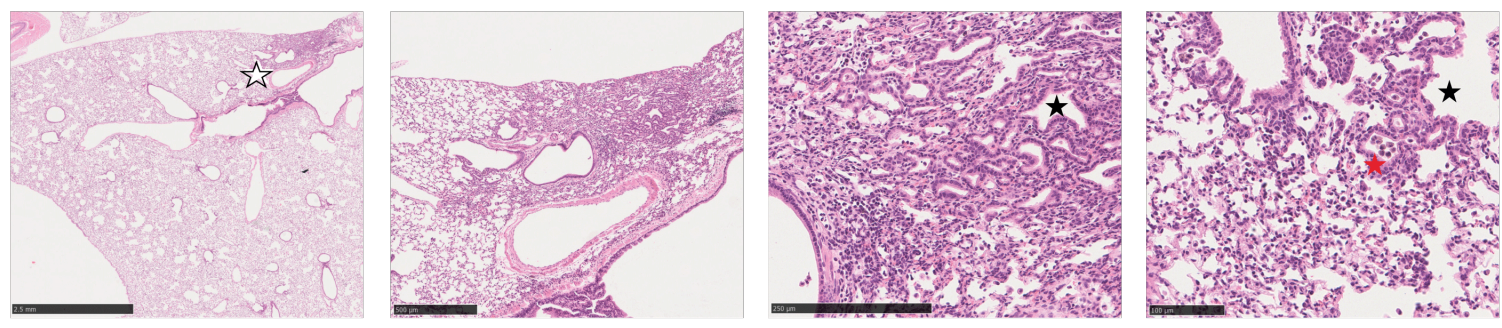

B

2.5mm

250µm

100µm

Mock

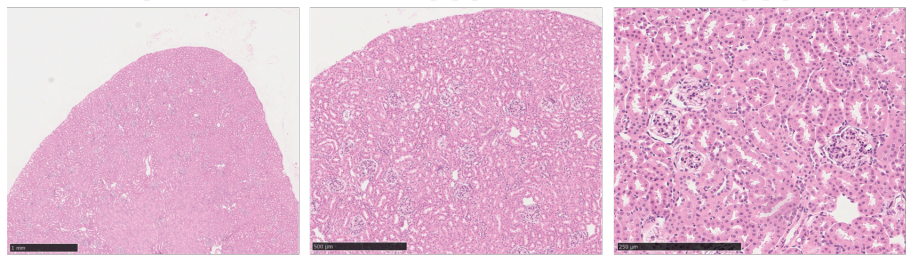

IAV

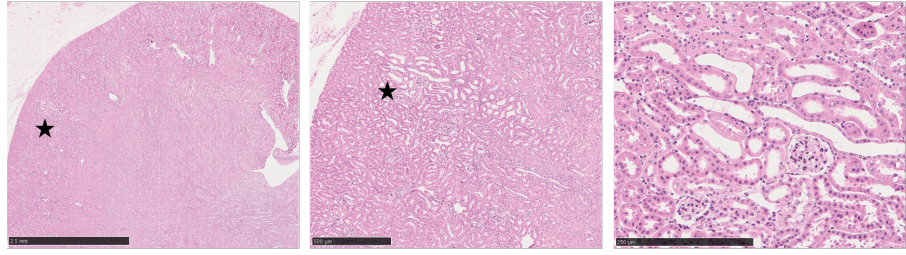

SARS-CoV-2

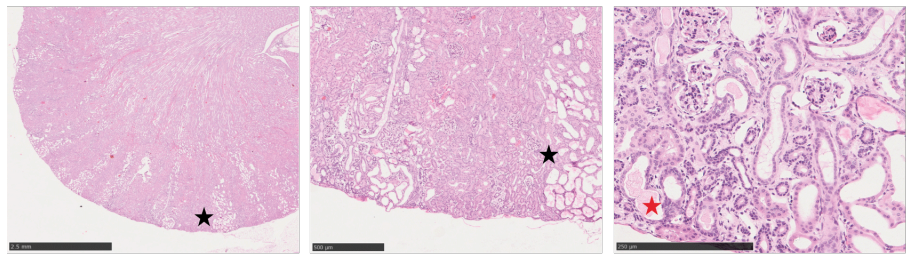

C

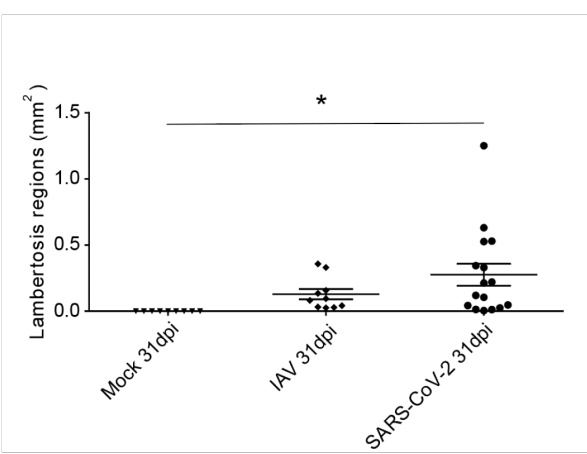

D

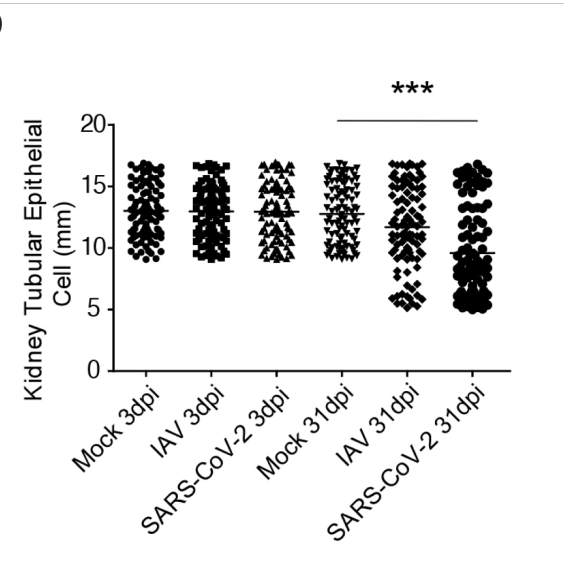

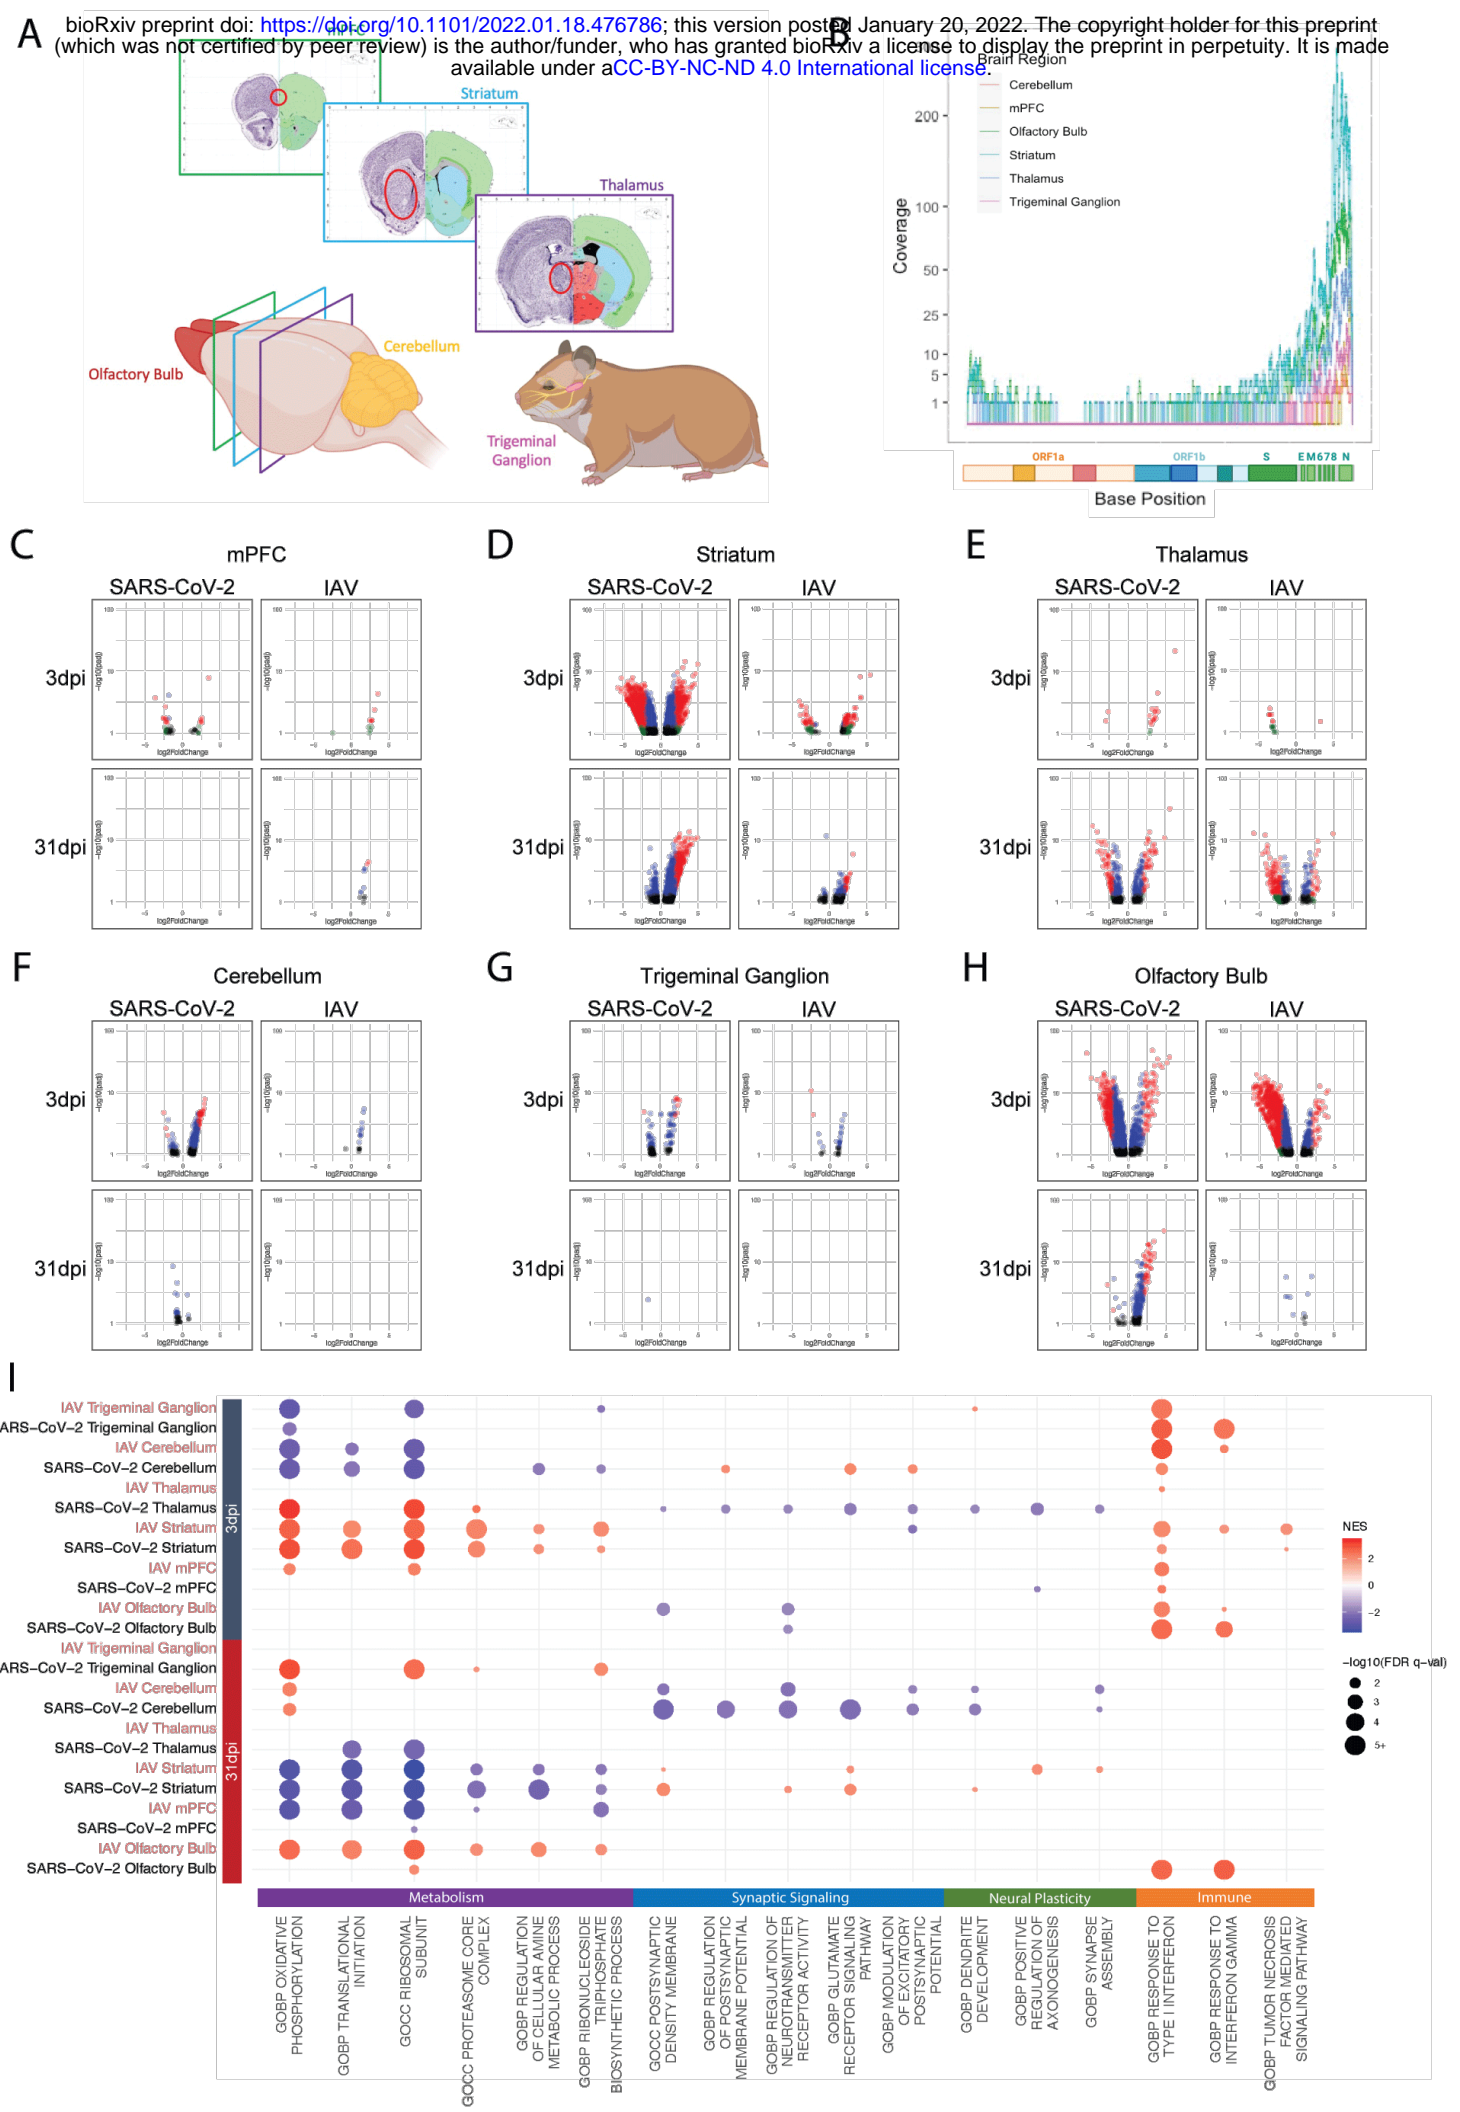

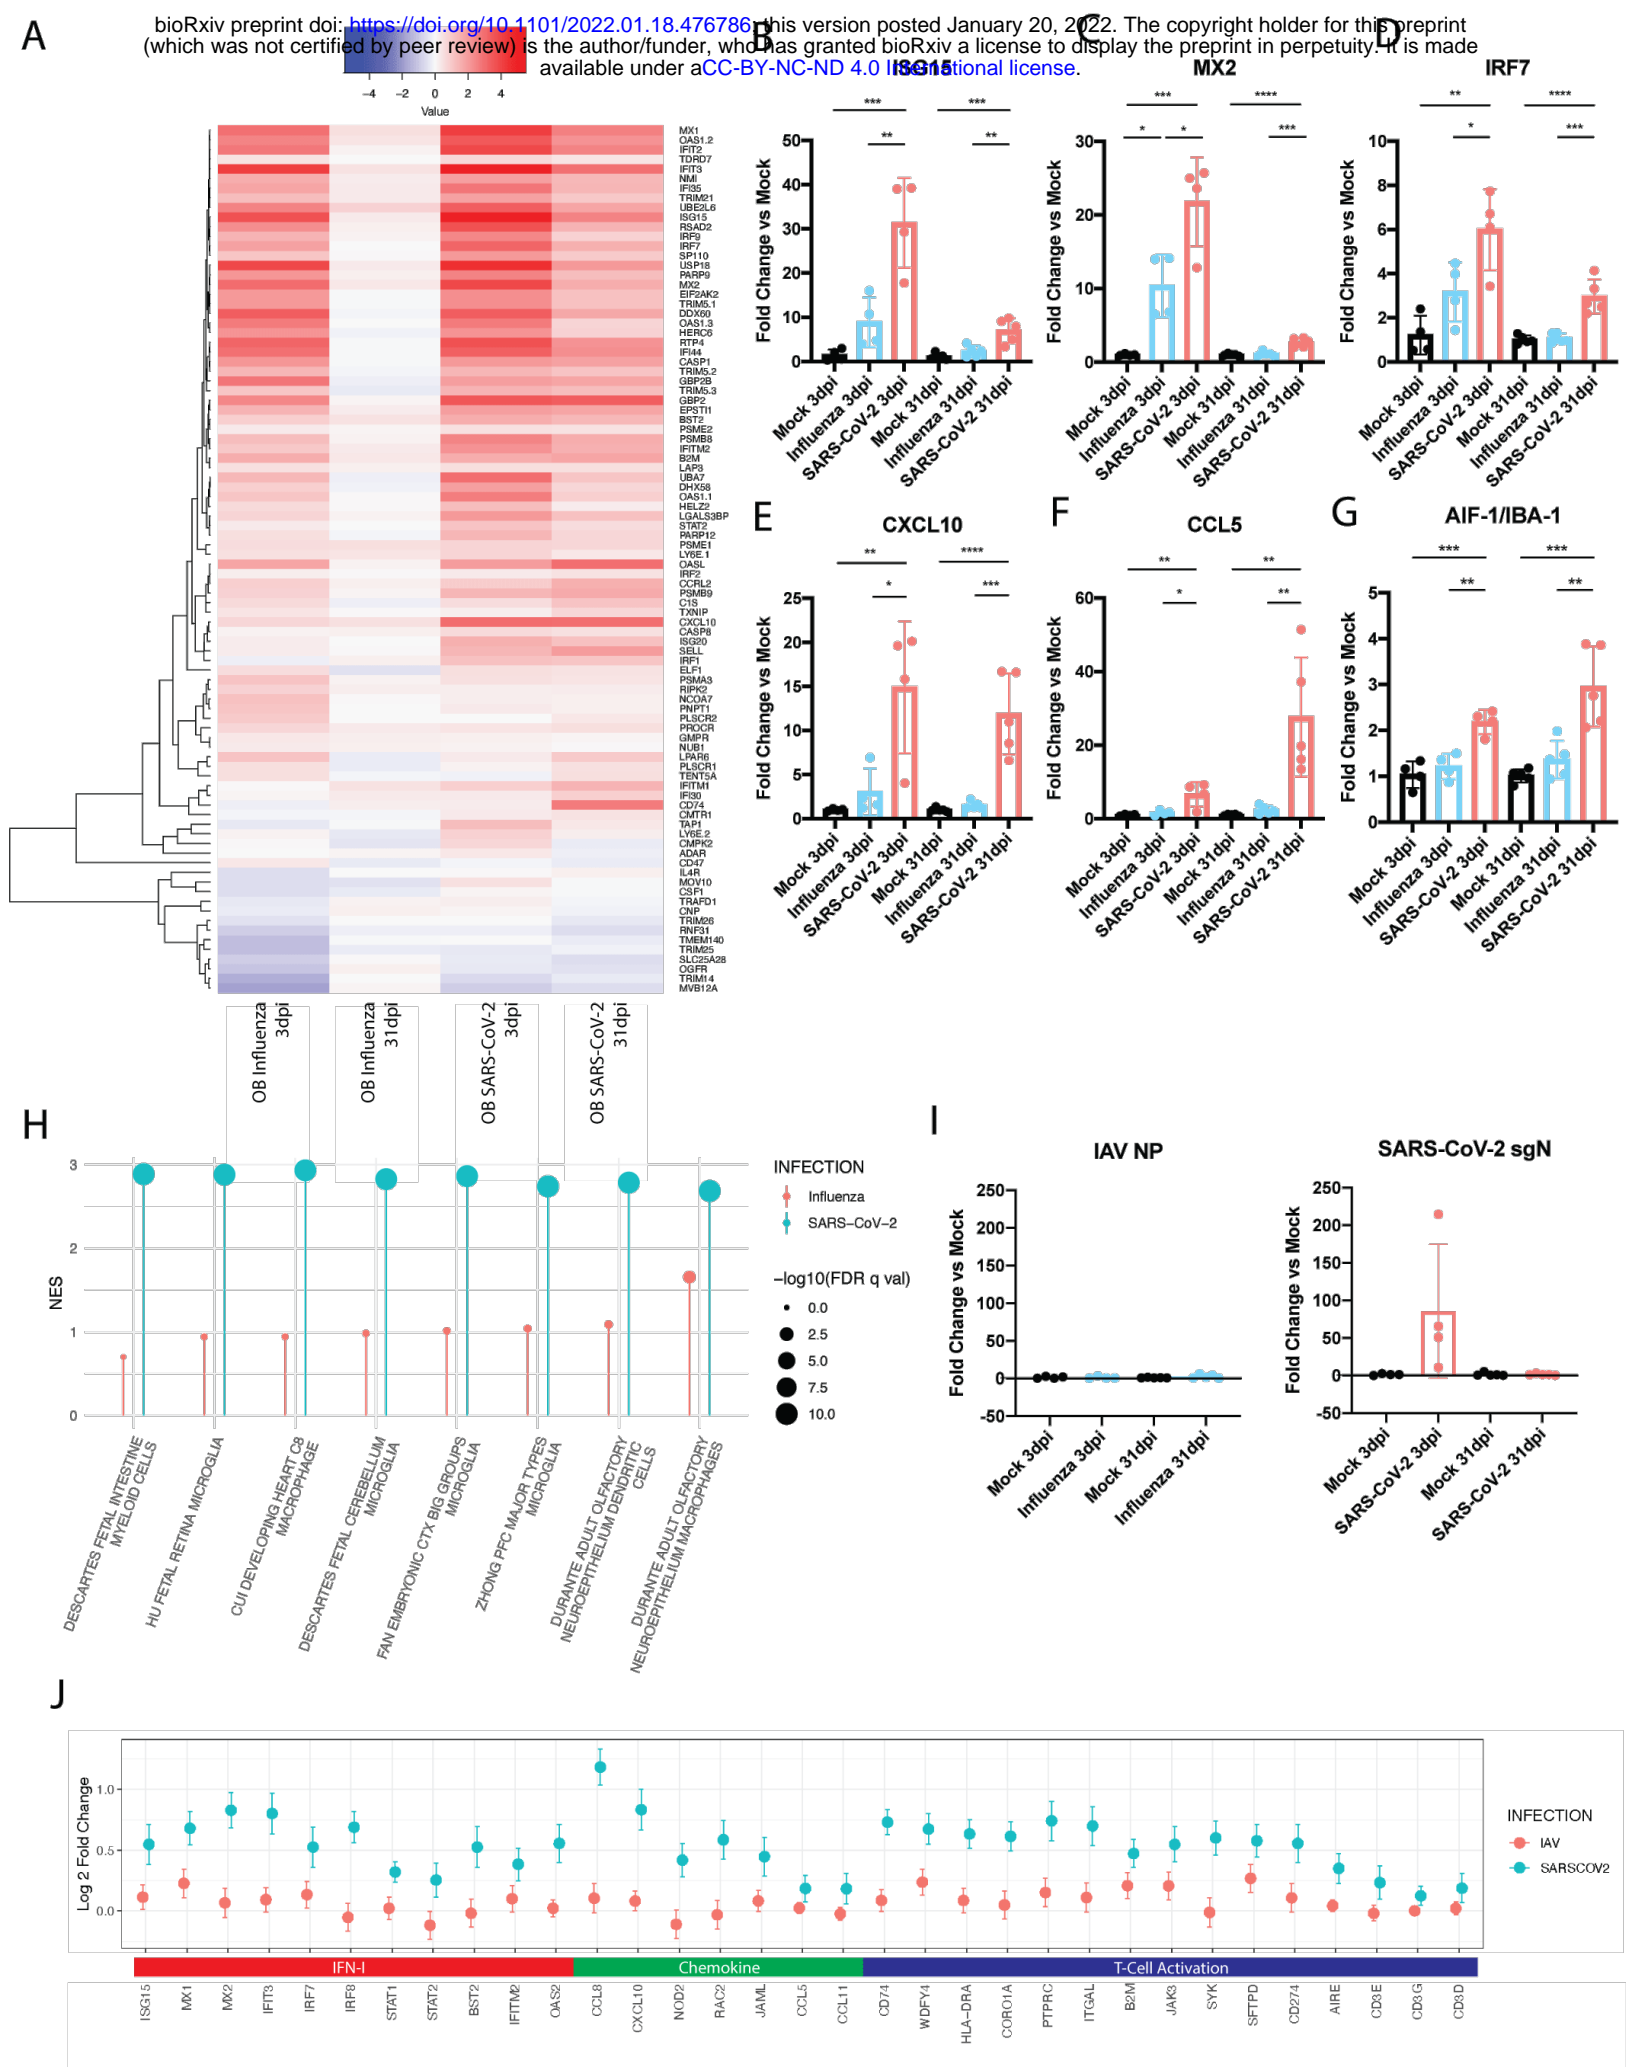

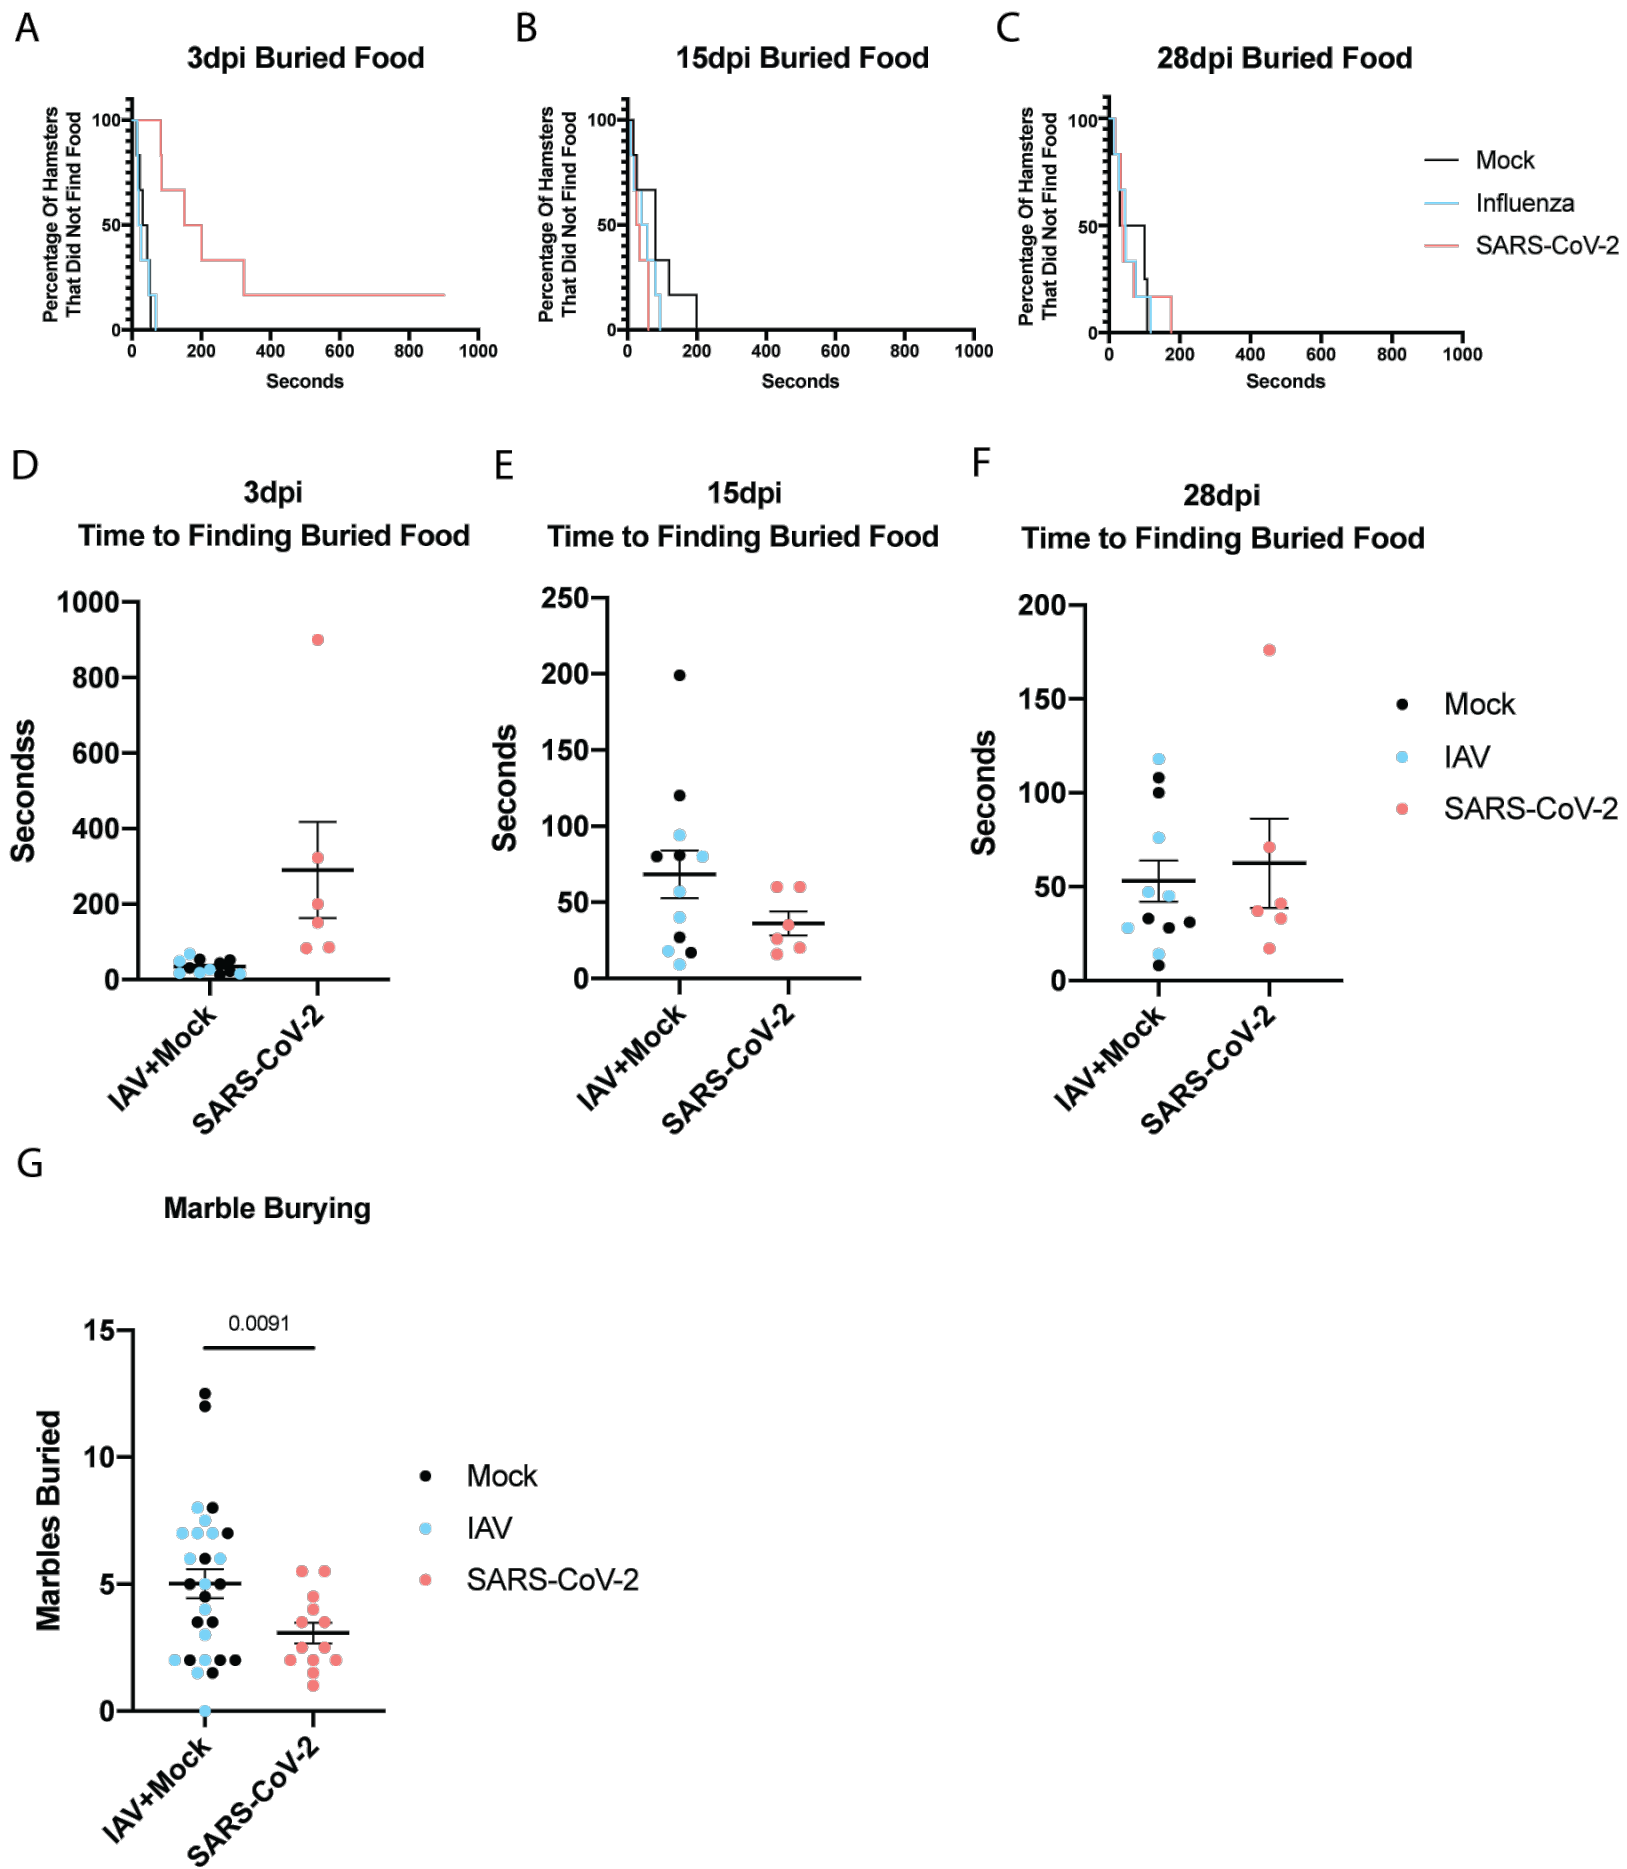

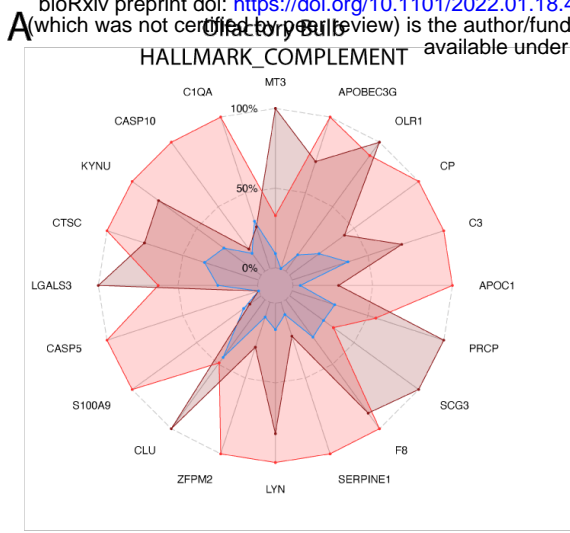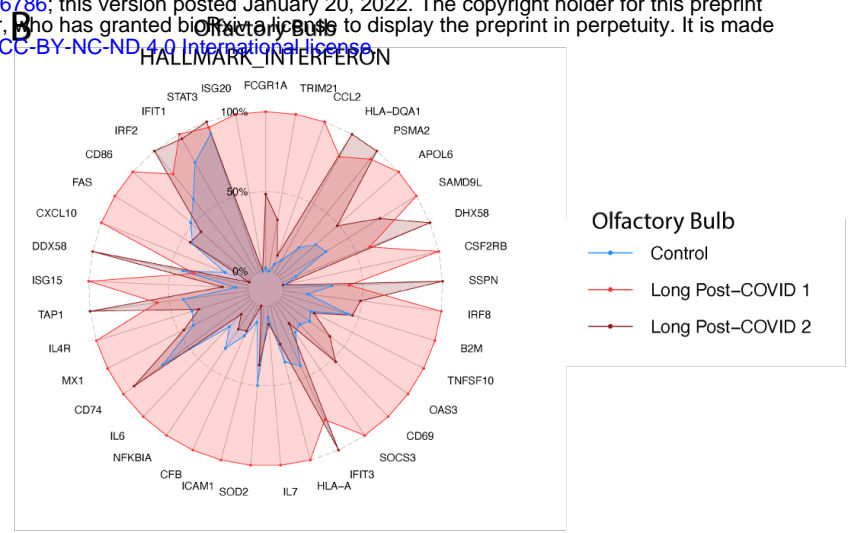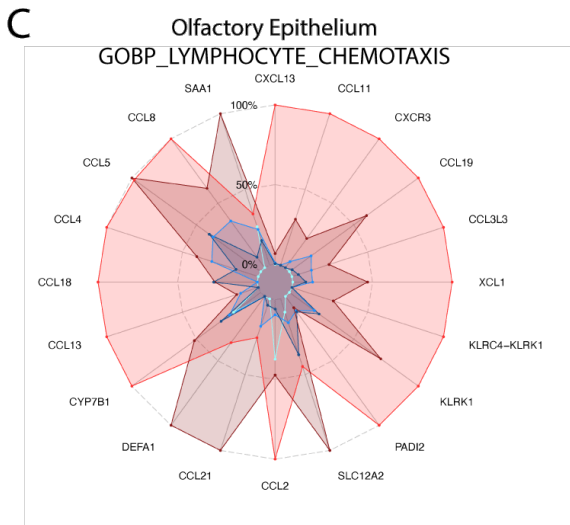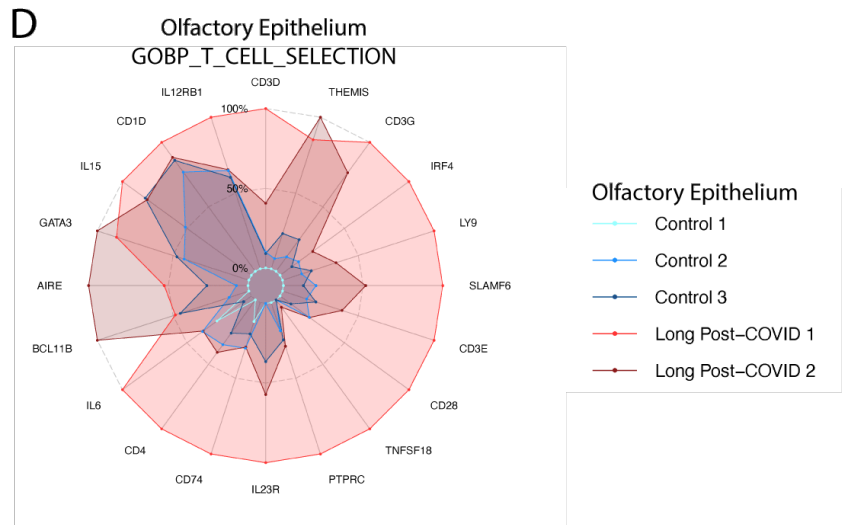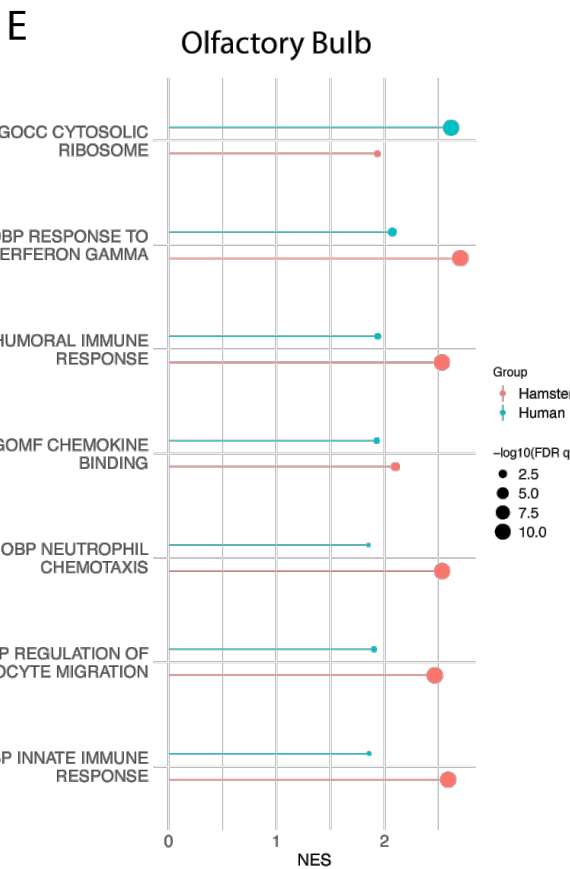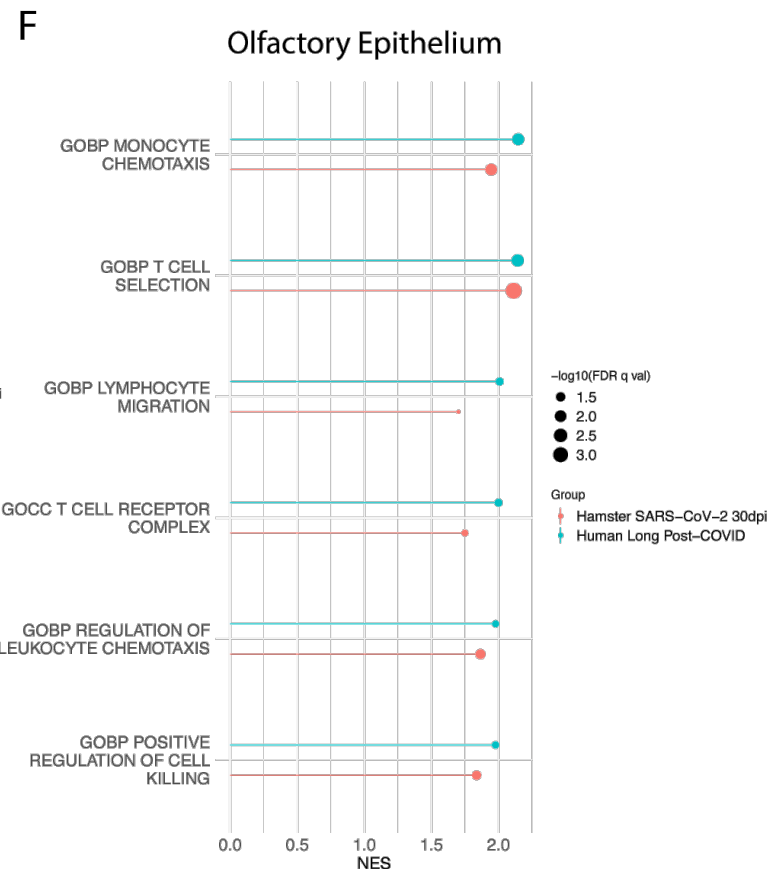

Source: https://www.biorxiv.org/content/10.1101/2022.01.18.476786v1.full.pdf
